# Supplementary material for: Tracheophyte of Xiao Hinggan Ling in China: an updated checklist
Source: Biodivers Data J. 2019 Mar 27;7:e32306. doi: 10.3897/BDJ.7.e32306 (PMC6477862; doi:10.3897/BDJ.7.e32306)
Supplement: Supplementary material 1 — New Checklist of vascular plants in Xiao Hinggan Ling-complete [file bdj-07-e32306-s001.xls]

## Sheet: Sheet2
New Checklist of vascular plants in Xiao Hinggan Ling
Taxa	Accepted_family	Accepted_gene	Accepted_name	Accepted_author	Notes for Added species(*)
Pteridophyta	Lycopodiaceae	Huperzia	Huperzia miyoshiana	(Makino) Ching
Pteridophyta	Lycopodiaceae	Huperzia	Huperzia selago	(L.) Bernh. ex Schrank & Mart.
Pteridophyta	Lycopodiaceae	Huperzia	Huperzia serrata	(Thunb.) Trevis.
Pteridophyta	Lycopodiaceae	Palhinhaea	Palhinhaea pungens	(Alderw.) Holub
Pteridophyta	Lycopodiaceae	Lycopodium	Lycopodium annotinum	L.
Pteridophyta	Lycopodiaceae	Lycopodium	Lycopodium clavatum	L.
Pteridophyta	Selaginellaceae	Selaginella	Selaginella helvetica	(L.) Spring
Pteridophyta	Selaginellaceae	Selaginella	Selaginella rossii	(Baker) Warb.
Pteridophyta	Selaginellaceae	Selaginella	Selaginella sanguinolenta	(L.) Spring
Pteridophyta	Selaginellaceae	Selaginella	Selaginella sibirica	(Milde) Hieron.
Pteridophyta	Selaginellaceae	Selaginella	Selaginella tamariscina	(P.Beauv.) Spring
Pteridophyta	Equisetaceae	Equisetum	Equisetum arvense	L.
Pteridophyta	Equisetaceae	Equisetum	Equisetum fluviatile	L.
Pteridophyta	Equisetaceae	Equisetum	Equisetum fluviatile fo. linnaenum	(Döll) M. Broun
Pteridophyta	Equisetaceae	Equisetum	Equisetum hyemale	L.
Pteridophyta	Equisetaceae	Equisetum	Equisetum palustre	L.
Pteridophyta	Equisetaceae	Equisetum	Equisetum pratense	Ehrh.
Pteridophyta	Equisetaceae	Equisetum	Equisetum ramosissimum	Desf.	*
Pteridophyta	Equisetaceae	Equisetum	Equisetum sylvaticum	L.
Pteridophyta	Equisetaceae	Hippochaete	Hippochaete variegatum	Börner
Pteridophyta	Ophioglossaceae	Botrychium	Botrychium boreale	J. Milde
Pteridophyta	Ophioglossaceae	Ophioglossum	Ophioglossum thermale	Kom.	*
Pteridophyta	Ophioglossaceae	Ophioglossum	Ophioglossum vulgatum	L.	*new genes
Pteridophyta	Hymenophyllaceae	Crepidomanes	Crepidomanes minutum	(Blume) K. Iwats.
Pteridophyta	Salviniaceae	Salvinia	Salvinia natans	(L.) All.	*
Pteridophyta	Pteridaceae	Adiantum	Adiantum pedatum	L.
Pteridophyta	Pteridaceae	Cheilanthes	Cheilanthes argentea	(S.G. Gmel.) Kunze
Pteridophyta	Pteridaceae	Leptolepidium	Leptolepidium kuhnii	(Milde) K.H. Shing & S.K. Wu
Pteridophyta	Dennstaedtiaceae	Pteridium	Pteridium aquilinum	(L.) Kuhn	*
Pteridophyta	Dennstaedtiaceae	Pteridium	Pteridium aquilinum var. latiusculum	(Desv.) Underw. ex A. Heller
Pteridophyta	Cystopteridaceae	Gymnocarpium	Gymnocarpium dryopteris	(L.) Newman
Pteridophyta	Cystopteridaceae	Gymnocarpium	Gymnocarpium jessoense	(Koidz.) Koidz.
Pteridophyta	Cystopteridaceae	Cystopteris	Cystopteris fragilis	(L.) Bernh.
Pteridophyta	Cystopteridaceae	Cystopteris	Cystopteris sudetica	A. Braun & Milde
Pteridophyta	Aspleniaceae	Asplenium	Asplenium incisum	Thunb.
Pteridophyta	Aspleniaceae	Asplenium	Asplenium nesii	Christ
Pteridophyta	Aspleniaceae	Asplenium	Asplenium subvarians	Ching
Pteridophyta	Aspleniaceae	Camptosorus	Camptosorus sibiricus	Rupr.
Pteridophyta	Thelypteridaceae	Phegopteris	Phegopteris polypodioides	Fée
Pteridophyta	Thelypteridaceae	Thelypteris	Thelypteris palustris var. pubescens	(Lawson) Fernald
Pteridophyta	Woodsiaceae	Woodsia	Woodsia ilvensis	(L.) R. Br.
Pteridophyta	Woodsiaceae	Woodsia	Woodsia intermedia	Tagawa
Pteridophyta	Woodsiaceae	Woodsia	Woodsia polystichoides	D.C. Eaton
Pteridophyta	Woodsiaceae	Woodsia	Woodsia subcordata	Turcz.
Pteridophyta	Athyriaceae	Deparia	Deparia coreana	(Christ) M. Kato
Pteridophyta	Athyriaceae	Deparia	Deparia pycnosora	(Christ) M. Kato
Pteridophyta	Athyriaceae	Allantodia	Allantodia crenata	(Sommerf.) Ching
Pteridophyta	Athyriaceae	Athyrium	Athyrium dailingense	Ching
Pteridophyta	Athyriaceae	Athyrium	Athyrium fallaciosum	Milde	*
Pteridophyta	Athyriaceae	Athyrium	Athyrium multidentatum	(Döll) Ching
Pteridophyta	Athyriaceae	Athyrium	Athyrium sinense	Rupr.
Pteridophyta	Athyriaceae	Athyrium	Athyrium spinulosum	(Maxim.) Milde
Pteridophyta	Athyriaceae	Athyrium	Athyrium yokoscense	(Franch. & Sav.) Christ
Pteridophyta	Onocleaceae	Onoclea	Onoclea interrupta	(Maxim.) Ching & P.C. Chiu
Pteridophyta	Onocleaceae	Onoclea	Onoclea sensibilis	L.	*
Pteridophyta	Onocleaceae	Matteuccia	Matteuccia struthiopteris	(L.) Tod.
Pteridophyta	Dryopteridaceae	Polystichum	Polystichum braunii	(Spenn.) Fée
Pteridophyta	Dryopteridaceae	Dryopteris	Dryopteris amurensis	Christ
Pteridophyta	Dryopteridaceae	Dryopteris	Dryopteris austriaca	(Jacq.) Woyn. ex Schinz & Thell.	*
Pteridophyta	Dryopteridaceae	Dryopteris	Dryopteris crassirhizoma	Nakai
Pteridophyta	Dryopteridaceae	Dryopteris	Dryopteris expansa	(C. Presl) Fraser-Jenk. & Jermy
Pteridophyta	Dryopteridaceae	Dryopteris	Dryopteris fragrans	(L.) Schott
Pteridophyta	Dryopteridaceae	Dryopteris	Dryopteris goeringiana	(Kunze) Koidz.
Pteridophyta	Dryopteridaceae	Dryopteris	Dryopteris sichotensis	Kom.
Pteridophyta	Polypodiaceae	Pyrrosia	Pyrrosia petiolosa	(Christ) Ching
Pteridophyta	Polypodiaceae	Lepisorus	Lepisorus ussuriensis	(Regel & Maack) Ching
Pteridophyta	Polypodiaceae	Polypodium	Polypodium virginianum	L.
Gymnospermae	Pinaceae	Abies	Abies holophylla	Maxim.	*
Gymnospermae	Pinaceae	Abies	Abies nephrolepis	(Trautv. ex Maxim.) Maxim.
Gymnospermae	Pinaceae	Picea	Picea jezoensis	(Siebold & Zucc.) Carrière
Gymnospermae	Pinaceae	Picea	Picea jezoensis var. komarovii	(V.N.Vassil.) W.C.Cheng & L.K.Fu
Gymnospermae	Pinaceae	Picea	Picea koraiensis	Nakai
Gymnospermae	Pinaceae	Picea	Picea koraiensis var. pungsanensis	(Uyeki ex Nakai) Farjon
Gymnospermae	Pinaceae	Picea	Picea koyamae	Shiras.	*
Gymnospermae	Pinaceae	Picea	Picea obovata	Ledeb.	*
Gymnospermae	Pinaceae	Larix	Larix gmelinii	(Rupr.) Kuzen.
Gymnospermae	Pinaceae	Larix	Larix gmelinii var. olgensis	(A.Henry) Ostenf. & Syrach
Gymnospermae	Pinaceae	Larix	Larix gmelinii var. principis-rupprechtii	(Mayr) Pilg.	*
Gymnospermae	Pinaceae	Pinus	Pinus armandii	Franch.	*
Gymnospermae	Pinaceae	Pinus	Pinus densiflora	Siebold & Zucc.	*
Gymnospermae	Pinaceae	Pinus	Pinus koraiensis	Siebold & Zucc.
Gymnospermae	Pinaceae	Pinus	Pinus pumila	(Pall.) Regel
Gymnospermae	Pinaceae	Pinus	Pinus sylvestris var. mongholica	Litv.
Gymnospermae	Cupressaceae	Juniperus	Juniperus communis var. saxatilis	Pall.
Gymnospermae	Taxaceae	Taxus	Taxus cuspidata	Siebold & Zucc.
Angiospermae	Nymphaeaceae	Nuphar	Nuphar pumila	(Timm) DC.
Angiospermae	Nymphaeaceae	Euryale	Euryale ferox	Salisb.	*new gene
Angiospermae	Nymphaeaceae	Nymphaea	Nymphaea nouchali	Burm.f.	*
Angiospermae	Nymphaeaceae	Nymphaea	Nymphaea tetragona	Georgi
Angiospermae	Schisandraceae	Schisandra	Schisandra chinensis	(Turcz.) Baill.
Angiospermae	Aristolochiaceae	Asarum	Asarum heterotropoides fo. mandshuricum	(Maxim.) Kitag.
Angiospermae	Aristolochiaceae	Aristolochia	Aristolochia contorta	Bunge
Angiospermae	Aristolochiaceae	Aristolochia	Aristolochia manshuriensis	Kom.	*
Angiospermae	Chloranthaceae	Chloranthus	Chloranthus japonicus	Siebold
Angiospermae	Acoraceae	Acorus	Acorus calamus	L.	*new family
Angiospermae	Araceae	Spirodela	Spirodela polyrrhiza	(L.) Schleid.
Angiospermae	Araceae	Lemna	Lemna japonica	Landolt	*
Angiospermae	Araceae	Lemna	Lemna minor	L.
Angiospermae	Araceae	Lemna	Lemna turionifera	Landolt	*
Angiospermae	Araceae	Calla	Calla palustris	L.
Angiospermae	Araceae	Arisaema	Arisaema amurense	Maxim.
Angiospermae	Araceae	Arisaema	Arisaema heterophyllum	Blume
Angiospermae	Araceae	Arisaema	Arisaema serratum	(Thunb.) Schott
Angiospermae	Alismataceae	Alisma	Alisma gramineum	Lej.	*
Angiospermae	Alismataceae	Alisma	Alisma plantago-aquatica subsp. orientale	(Sam.) Sam.
Angiospermae	Alismataceae	Sagittaria	Sagittaria natans	Pall.
Angiospermae	Alismataceae	Sagittaria	Sagittaria trifolia	L.	*
Angiospermae	Butomaceae	Butomus	Butomus umbellatus	L.	*new family
Angiospermae	Hydrocharitaceae	Najas	Najas marina	L.
Angiospermae	Hydrocharitaceae	Najas	Najas minor	All.	*
Angiospermae	Juncaginaceae	Triglochin	Triglochin maritima	L.
Angiospermae	Juncaginaceae	Triglochin	Triglochin palustris	L.
Angiospermae	Potamogetonaceae	Stuckenia	Stuckenia pectinata	(L.) Börner
Angiospermae	Potamogetonaceae	Potamogeton	Potamogeton cristatus	Regel & Maack
Angiospermae	Potamogetonaceae	Potamogeton	Potamogeton gramineus	L.
Angiospermae	Potamogetonaceae	Potamogeton	Potamogeton maackianus	A.Benn.
Angiospermae	Potamogetonaceae	Potamogeton	Potamogeton natans	L.
Angiospermae	Potamogetonaceae	Potamogeton	Potamogeton nodosus	Poir.
Angiospermae	Potamogetonaceae	Potamogeton	Potamogeton octandrus var. mizuhikimo	(Makino) H.Hara	*
Angiospermae	Potamogetonaceae	Potamogeton	Potamogeton oxyphyllus	Miq.	*
Angiospermae	Potamogetonaceae	Potamogeton	Potamogeton perfoliatus	L.	*
Angiospermae	Potamogetonaceae	Potamogeton	Potamogeton polygonifolius	Pourr.	*
Angiospermae	Potamogetonaceae	Potamogeton	Potamogeton pusillus	L.	*
Angiospermae	Dioscoreaceae	Dioscorea	Dioscorea nipponica	Makino
Angiospermae	Dioscoreaceae	Dioscorea	Dioscorea oppositifolia	L.	*
Angiospermae	Melanthiaceae	Veratrum	Veratrum dahuricum	(Turcz.) O.Loes.
Angiospermae	Melanthiaceae	Veratrum	Veratrum maackii	Regel
Angiospermae	Melanthiaceae	Veratrum	Veratrum nigrum	L.
Angiospermae	Melanthiaceae	Veratrum	Veratrum oxysepalum	Turcz.
Angiospermae	Melanthiaceae	Paris	Paris quadrifolia	L.
Angiospermae	Melanthiaceae	Paris	Paris verticillata	M.Bieb.
Angiospermae	Colchicaceae	Disporum	Disporum viridescens	(Maxim.) Nakai
Angiospermae	Smilacaceae	Smilax	Smilax nipponica	Miq.	*
Angiospermae	Smilacaceae	Smilax	Smilax riparia	A.DC.	*
Angiospermae	Liliaceae	Clintonia	Clintonia udensis	Trautv. & C.A.Mey.
Angiospermae	Liliaceae	Gagea	Gagea hiensis	Pascher
Angiospermae	Liliaceae	Gagea	Gagea nakaiana	Kitag.
Angiospermae	Liliaceae	Gagea	Gagea pauciflora	(Turcz. ex Trautv.) Ledeb.	*
Angiospermae	Liliaceae	Gagea	Gagea triflora	(Ledeb.) Schult. & Schult.f.	*
Angiospermae	Liliaceae	Fritillaria	Fritillaria maximowiczii	Freyn
Angiospermae	Liliaceae	Fritillaria	Fritillaria usuriensis	Maxim.
Angiospermae	Liliaceae	Lilium	Lilium brownii var. viridulum	Baker	*
Angiospermae	Liliaceae	Lilium	Lilium cernuum	Kom.	*
Angiospermae	Liliaceae	Lilium	Lilium concolor	Salisb.	*
Angiospermae	Liliaceae	Lilium	Lilium concolor var. pulchellum	(Fisch.) Baker
Angiospermae	Liliaceae	Lilium	Lilium distichum	Nakai ex Kamib.
Angiospermae	Liliaceae	Lilium	Lilium pensylvanicum	Ker Gawl.
Angiospermae	Liliaceae	Lilium	Lilium pumilum	Delile
Angiospermae	Orchidaceae	Pogonia	Pogonia japonica	Rchb.f.
Angiospermae	Orchidaceae	Cypripedium	Cypripedium calceolus	L.
Angiospermae	Orchidaceae	Cypripedium	Cypripedium guttatum	Sw.
Angiospermae	Orchidaceae	Cypripedium	Cypripedium macranthos	Sw.
Angiospermae	Orchidaceae	Cypripedium	Cypripedium micranthum	Franch.
Angiospermae	Orchidaceae	Cypripedium	Cypripedium shanxiense	S. C. Chen	*
Angiospermae	Orchidaceae	Habenaria	Habenaria linearifolia	Maxim.	*
Angiospermae	Orchidaceae	Habenaria	Habenaria sagittifera	Rchb.f.
Angiospermae	Orchidaceae	Herminium	Herminium monorchis	(L.) R.Br.
Angiospermae	Orchidaceae	Ponerorchis	Ponerorchis chusua	(D.Don) Soó
Angiospermae	Orchidaceae	Neottianthe	Neottianthe cucullata	(L.) Schltr.
Angiospermae	Orchidaceae	Gymnadenia	Gymnadenia conopsea	(L.) R.Br.
Angiospermae	Orchidaceae	Dactylorhiza	Dactylorhiza viridis	(L.) R.M.Bateman, Pridgeon & M.W.Chase
Angiospermae	Orchidaceae	Galearis	Galearis cyclochila	(Franch. & Sav.) Soó
Angiospermae	Orchidaceae	Platanthera	Platanthera chlorantha	(Custer) Rchb.
Angiospermae	Orchidaceae	Platanthera	Platanthera fuscescens	(L.) Kraenzl.
Angiospermae	Orchidaceae	Platanthera	Platanthera hologlottis	Maxim.
Angiospermae	Orchidaceae	Goodyera	Goodyera repens	(L.) R.Br.
Angiospermae	Orchidaceae	Epipactis	Epipactis helleborine	(L.) Crantz	*new gene
Angiospermae	Orchidaceae	Epipactis	Epipactis xanthophaea	Schltr.	*new gene+
Angiospermae	Orchidaceae	Spiranthes	Spiranthes sinensis	(Pers.) Ames
Angiospermae	Orchidaceae	Neottia	Neottia papilligera	Schltr.
Angiospermae	Orchidaceae	Neottia	Neottia puberula	(Maxim.) Szlach.
Angiospermae	Orchidaceae	Epipogium	Epipogium aphyllum	Sw.
Angiospermae	Orchidaceae	Malaxis	Malaxis monophyllos	(L.) Sw.
Angiospermae	Iridaceae	Iris	Iris ensata	Thunb.
Angiospermae	Iridaceae	Iris	Iris laevigata	Fisch.
Angiospermae	Iridaceae	Iris	Iris ruthenica	Ker Gawl.
Angiospermae	Iridaceae	Iris	Iris sanguinea	Donn ex Hornem.
Angiospermae	Iridaceae	Iris	Iris setosa	Pall. ex Link	*
Angiospermae	Iridaceae	Iris	Iris typhifolia	Kitag.
Angiospermae	Iridaceae	Iris	Iris uniflora	Pall. ex Link
Angiospermae	Iridaceae	Iris	Iris ventricosa	Pall.	*
Angiospermae	Asphodelaceae	Hemerocallis	Hemerocallis citrina	Baroni	*
Angiospermae	Asphodelaceae	Hemerocallis	Hemerocallis fulva	(L.) L.	*
Angiospermae	Asphodelaceae	Hemerocallis	Hemerocallis lilioasphodelus	L.
Angiospermae	Asphodelaceae	Hemerocallis	Hemerocallis middendorffii	Trautv. & C.A.Mey.
Angiospermae	Asphodelaceae	Hemerocallis	Hemerocallis minor	Mill.
Angiospermae	Amaryllidaceae	Allium	Allium anisopodium	Ledeb.	*
Angiospermae	Amaryllidaceae	Allium	Allium condensatum	Turcz.
Angiospermae	Amaryllidaceae	Allium	Allium ledebourianum	Schult. & Schult.f.
Angiospermae	Amaryllidaceae	Allium	Allium leucocephalum	Turcz. ex Ledeb.	*
Angiospermae	Amaryllidaceae	Allium	Allium macrostemon	Bunge
Angiospermae	Amaryllidaceae	Allium	Allium monanthum	Maxim.
Angiospermae	Amaryllidaceae	Allium	Allium przewalskianum	Regel	*
Angiospermae	Amaryllidaceae	Allium	Allium ramosum	L.
Angiospermae	Amaryllidaceae	Allium	Allium sacculiferum	Maxim.	*
Angiospermae	Amaryllidaceae	Allium	Allium schoenoprasum	L.	*
Angiospermae	Amaryllidaceae	Allium	Allium senescens	L.
Angiospermae	Amaryllidaceae	Allium	Allium strictum	Schrad.
Angiospermae	Amaryllidaceae	Allium	Allium tenuissimum	L.
Angiospermae	Amaryllidaceae	Allium	Allium thunbergii	G.Don	*
Angiospermae	Amaryllidaceae	Allium	Allium victorialis	L.
Angiospermae	Asparagaceae	Anemarrhena	Anemarrhena asphodeloides	Bunge
Angiospermae	Asparagaceae	Asparagus	Asparagus dauricus	Fisch. ex Link	*
Angiospermae	Asparagaceae	Asparagus	Asparagus schoberioides	Kunth
Angiospermae	Asparagaceae	Asparagus	Asparagus trichophyllus	Bunge	*
Angiospermae	Asparagaceae	Convallaria	Convallaria keiskei	Miq.
Angiospermae	Asparagaceae	Convallaria	Convallaria majalis	L.	*
Angiospermae	Asparagaceae	Maianthemum	Maianthemum bifolium	(L.) F.W.Schmidt
Angiospermae	Asparagaceae	Maianthemum	Maianthemum japonicum	(A.Gray) LaFrankie
Angiospermae	Asparagaceae	Maianthemum	Maianthemum trifolium	(L.) Sloboda
Angiospermae	Asparagaceae	Smilacina	Smilacina davurica	Fisch. & C.A. Mey.
Angiospermae	Asparagaceae	Polygonatum	Polygonatum desoulayi	Kom.
Angiospermae	Asparagaceae	Polygonatum	Polygonatum humile	Fisch. ex Maxim.
Angiospermae	Asparagaceae	Polygonatum	Polygonatum involucratum	(Franch. & Sav.) Maxim.
Angiospermae	Asparagaceae	Polygonatum	Polygonatum odoratum	(Mill.) Druce
Angiospermae	Asparagaceae	Polygonatum	Polygonatum odoratum var. pluriflorum	(Miq.) Ohwi	*
Angiospermae	Asparagaceae	Polygonatum	Polygonatum odoratum var. thunbergii	(C.Morren & Decne.) H.Hara	*
Angiospermae	Asparagaceae	Polygonatum	Polygonatum stenophyllum	Maxim.	*
Angiospermae	Commelinaceae	Commelina	Commelina communis	L.
Angiospermae	Pontederiaceae	Monochoria	Monochoria korsakowii	Regel & Maack
Angiospermae	Typhaceae	Sparganium	Sparganium emersum	Rehmann
Angiospermae	Typhaceae	Sparganium	Sparganium erectum	L.	*
Angiospermae	Typhaceae	Sparganium	Sparganium eurycarpum subsp. coreanum	(H.Lév.) C.D.K.Cook & M.S.Nicholls	*
Angiospermae	Typhaceae	Sparganium	Sparganium glomeratum	(Laest. ex Beurl.) Beurl.
Angiospermae	Typhaceae	Sparganium	Sparganium natans	L.
Angiospermae	Typhaceae	Typha	Typha angustifolia	L.
Angiospermae	Typhaceae	Typha	Typha davidiana	(Kronf.) Hand.-Mazz.
Angiospermae	Typhaceae	Typha	Typha latifolia	L.
Angiospermae	Typhaceae	Typha	Typha laxmannii	Lepech.
Angiospermae	Typhaceae	Typha	Typha minima	Funck	*
Angiospermae	Typhaceae	Typha	Typha orientalis	C.Presl
Angiospermae	Typhaceae	Typha	Typha przewalskii	Skvortsov	*
Angiospermae	Eriocaulaceae	Eriocaulon	Eriocaulon atrum	Nakai	*
Angiospermae	Eriocaulaceae	Eriocaulon	Eriocaulon decemflorum	Maxim.	*
Angiospermae	Juncaceae	Luzula	Luzula pallescens	Sw.
Angiospermae	Juncaceae	Luzula	Luzula rufescens	Fisch. ex E.Mey.
Angiospermae	Juncaceae	Juncus	Juncus articulatus	L.	*
Angiospermae	Juncaceae	Juncus	Juncus brachyspathus	Maxim.
Angiospermae	Juncaceae	Juncus	Juncus bufonius	L.
Angiospermae	Juncaceae	Juncus	Juncus effusus	L.
Angiospermae	Juncaceae	Juncus	Juncus gracillimus	(Buchenau) V.I.Krecz. & Gontsch.
Angiospermae	Juncaceae	Juncus	Juncus grisebachii	Buchenau	*
Angiospermae	Juncaceae	Juncus	Juncus papillosus	Franch. & Sav.
Angiospermae	Juncaceae	Juncus	Juncus wallichianus	J.Gay ex Laharpe
Angiospermae	Cyperaceae	Trichophorum	Trichophorum pumilum	(Vahl) Schinz & Thell.	*new gene
Angiospermae	Cyperaceae	Scirpus	Scirpus lushanensis	Ohwi	*
Angiospermae	Cyperaceae	Scirpus	Scirpus orientalis	Ohwi
Angiospermae	Cyperaceae	Scirpus	Scirpus radicans	Schkuhr
Angiospermae	Cyperaceae	Scirpus	Scirpus sylvaticus	L.	*
Angiospermae	Cyperaceae	Eriophorum	Eriophorum angustifolium	Honck.
Angiospermae	Cyperaceae	Eriophorum	Eriophorum chamissonis	C.A.Mey.
Angiospermae	Cyperaceae	Eriophorum	Eriophorum gracile	Koch
Angiospermae	Cyperaceae	Eriophorum	Eriophorum vaginatum	L.
Angiospermae	Cyperaceae	Carex	Carex pallida	Salisb.
Angiospermae	Cyperaceae	Carex	Carex aperta	Boott
Angiospermae	Cyperaceae	Carex	Carex appendiculata	(Trautv. & C.A.Mey.) Kük.
Angiospermae	Cyperaceae	Carex	Carex arnellii	Christ ex Scheutz
Angiospermae	Cyperaceae	Carex	Carex atherodes	Spreng.
Angiospermae	Cyperaceae	Carex	Carex augustinowiczii	Meinsh.
Angiospermae	Cyperaceae	Carex	Carex bohemica	Schreb.
Angiospermae	Cyperaceae	Carex	Carex bostrychostigma	Maxim.
Angiospermae	Cyperaceae	Carex	Carex breviculmis	R.Br.	*
Angiospermae	Cyperaceae	Carex	Carex callitrichos	V.I.Krecz.
Angiospermae	Cyperaceae	Carex	Carex callitrichos var. nana	(H.Lév. & Vaniot) S.Yun Liang, L.K.Dai & Y.C.Tang	*
Angiospermae	Cyperaceae	Carex	Carex canescens	L.
Angiospermae	Cyperaceae	Carex	Carex capillacea	Boott
Angiospermae	Cyperaceae	Carex	Carex cespitosa	L.
Angiospermae	Cyperaceae	Carex	Carex cinerascens	Kük.
Angiospermae	Cyperaceae	Carex	Carex dahurica	Kük.
Angiospermae	Cyperaceae	Carex	Carex dailingensis	Y.L.Chou
Angiospermae	Cyperaceae	Carex	Carex disperma	Dewey
Angiospermae	Cyperaceae	Carex	Carex drymophila	Turcz.
Angiospermae	Cyperaceae	Carex	Carex eremopyroides	V.I.Krecz.
Angiospermae	Cyperaceae	Carex	Carex filipes var. oligostachys	Kük.
Angiospermae	Cyperaceae	Carex	Carex glabrescens	(Kük.) Ohwi
Angiospermae	Cyperaceae	Carex	Carex glauciformis	Meinsh.
Angiospermae	Cyperaceae	Carex	Carex globularis	L.
Angiospermae	Cyperaceae	Carex	Carex gotoi	Ohwi	*
Angiospermae	Cyperaceae	Carex	Carex hypochlora	Freyn
Angiospermae	Cyperaceae	Carex	Carex jaluensis	Kom.	*
Angiospermae	Cyperaceae	Carex	Carex kirganica	Kom.	*
Angiospermae	Cyperaceae	Carex	Carex kobomugi	Ohwi	*
Angiospermae	Cyperaceae	Carex	Carex korshinskyi	Kom.	*
Angiospermae	Cyperaceae	Carex	Carex laevissima	Nakai
Angiospermae	Cyperaceae	Carex	Carex lanceolata	Boott
Angiospermae	Cyperaceae	Carex	Carex lanceolata var. laxa	Ohwi	*
Angiospermae	Cyperaceae	Carex	Carex lanceolata var. subpediformis	Kük.	*
Angiospermae	Cyperaceae	Carex	Carex lasiocarpa	Ehrh.
Angiospermae	Cyperaceae	Carex	Carex latisquamea	Kom.
Angiospermae	Cyperaceae	Carex	Carex leiorhyncha	C.A.Mey.
Angiospermae	Cyperaceae	Carex	Carex limosa	L.
Angiospermae	Cyperaceae	Carex	Carex lithophila	Turcz.	*
Angiospermae	Cyperaceae	Carex	Carex loliacea	L.
Angiospermae	Cyperaceae	Carex	Carex longirostrata	C.A.Mey.
Angiospermae	Cyperaceae	Carex	Carex maackii	Maxim.	*
Angiospermae	Cyperaceae	Carex	Carex media	R.Br.
Angiospermae	Cyperaceae	Carex	Carex meyeriana	Kunth
Angiospermae	Cyperaceae	Carex	Carex mollicula	Boott	*
Angiospermae	Cyperaceae	Carex	Carex neurocarpa	Maxim.
Angiospermae	Cyperaceae	Carex	Carex obtusata	Lilj.
Angiospermae	Cyperaceae	Carex	Carex onoei	Franch. & Sav.
Angiospermae	Cyperaceae	Carex	Carex pediformis	C.A.Mey.
Angiospermae	Cyperaceae	Carex	Carex pilosa	Scop.
Angiospermae	Cyperaceae	Carex	Carex planiculmis	Kom.
Angiospermae	Cyperaceae	Carex	Carex pseudocuraica	F.Schmidt
Angiospermae	Cyperaceae	Carex	Carex pseudohypochlora	Y.L.Chang & Y.L.Yang
Angiospermae	Cyperaceae	Carex	Carex quadriflora	(Kük.) Ohwi
Angiospermae	Cyperaceae	Carex	Carex raddei	Kük.	*
Angiospermae	Cyperaceae	Carex	Carex remotiuscula	Wahlenb.
Angiospermae	Cyperaceae	Carex	Carex rostrata	Stokes
Angiospermae	Cyperaceae	Carex	Carex schmidtii	Meinsh.
Angiospermae	Cyperaceae	Carex	Carex sedakowii	C.A.Mey. ex Meinsh.	*
Angiospermae	Cyperaceae	Carex	Carex siderosticta	Hance
Angiospermae	Cyperaceae	Carex	Carex siderosticta var. pilosa	H.Lév. ex T.Koyama	*
Angiospermae	Cyperaceae	Carex	Carex sordida	Van Heurck & Müll.Arg.
Angiospermae	Cyperaceae	Carex	Carex tenuiflora	Wahlenb.
Angiospermae	Cyperaceae	Carex	Carex tenuiformis	H.Lév. & Vaniot
Angiospermae	Cyperaceae	Carex	Carex thunbergii	Steud.
Angiospermae	Cyperaceae	Carex	Carex uda	Maxim.
Angiospermae	Cyperaceae	Carex	Carex ulobasis	V.I.Krecz.
Angiospermae	Cyperaceae	Carex	Carex umbrosa subsp. pseudosabynensis	T.V.Egorova
Angiospermae	Cyperaceae	Carex	Carex ussuriensis	Kom.
Angiospermae	Cyperaceae	Carex	Carex rhynchophysa	Fisch., C.A.Mey. & Avé-Lall.
Angiospermae	Cyperaceae	Carex	Carex vaginata var. petersii	(C.A.Mey. ex Schmidt) Akiyama
Angiospermae	Cyperaceae	Carex	Carex vesicaria	L.
Angiospermae	Cyperaceae	Carex	Carex xyphium	Kom.	*
Angiospermae	Cyperaceae	Carex	Carex yamatsutana	Ohwi
Angiospermae	Cyperaceae	Fimbristylis	Fimbristylis squarrosa	Vahl	*
Angiospermae	Cyperaceae	Fimbristylis	Fimbristylis squarrosa var. esquarrosa	Makino	*
Angiospermae	Cyperaceae	Eleocharis	Eleocharis acicularis	(L.) Roem. & Schult.	*
Angiospermae	Cyperaceae	Eleocharis	Eleocharis geniculata	(L.) Roem. & Schult.	*
Angiospermae	Cyperaceae	Eleocharis	Eleocharis mamillata	(H.Lindb.) H.Lindb.
Angiospermae	Cyperaceae	Eleocharis	Eleocharis maximowiczii	Zinserl.	*
Angiospermae	Cyperaceae	Eleocharis	Eleocharis ovata	(Roth) Roem. & Schult.
Angiospermae	Cyperaceae	Eleocharis	Eleocharis palustris	(L.) Roem. & Schult.
Angiospermae	Cyperaceae	Eleocharis	Eleocharis retroflexa subsp. chaetaria	(Roem. & Schult.) T.Koyama	*
Angiospermae	Cyperaceae	Eleocharis	Eleocharis wichurae	Boeckeler
Angiospermae	Cyperaceae	Eleocharis	Eleocharis yokoscensis	(Franch. & Sav.) Tang & F.T.Wang
Angiospermae	Cyperaceae	Bolboschoenus	Bolboschoenus fluviatilis	(Torr.) Soják
Angiospermae	Cyperaceae	Bolboschoenus	Bolboschoenus planiculmis	(F.Schmidt) T.V.Egorova	*
Angiospermae	Cyperaceae	Bolboschoenus	Bolboschoenus yagara	(Ohwi) Y.C.Yang & M.Zhan	*
Angiospermae	Cyperaceae	Schoenoplectus	Schoenoplectus tabernaemontani	(C.C.Gmel.) Palla
Angiospermae	Cyperaceae	Schoenoplectus	Schoenoplectus triqueter	(L.) Palla
Angiospermae	Cyperaceae	Schoenoplectiella	Schoenoplectiella juncoides	(Roxb.) Lye	*
Angiospermae	Cyperaceae	Schoenoplectiella	Schoenoplectiella komarovii	(Roshev.) J.Jung & H.K.Choi
Angiospermae	Cyperaceae	Schoenoplectiella	Schoenoplectiella mucronata	(L.) J.Jung & H.K.Choi
Angiospermae	Cyperaceae	Cyperus	Cyperus amuricus	Maxim.	*
Angiospermae	Cyperaceae	Cyperus	Cyperus difformis	L.
Angiospermae	Cyperaceae	Cyperus	Cyperus glomeratus	L.
Angiospermae	Cyperaceae	Cyperus	Cyperus michelianus	(L.) Delile
Angiospermae	Cyperaceae	Cyperus	Cyperus microiria	Steud.	*
Angiospermae	Cyperaceae	Cyperus	Cyperus orthostachyus	Franch. & Sav.
Angiospermae	Cyperaceae	Pycreus	Pycreus flavidus	(Retz.) T.Koyama
Angiospermae	Cyperaceae	Pycreus	Pycreus flavidus var. nilagiricus	(Hochst. ex Steud.) Karthik.	*
Angiospermae	Poaceae	Zizania	Zizania latifolia	(Griseb.) Turcz. ex Stapf
Angiospermae	Poaceae	Glyceria	Glyceria arundinacea	Kunth
Angiospermae	Poaceae	Glyceria	Glyceria leptolepis	Ohwi
Angiospermae	Poaceae	Glyceria	Glyceria leptorhiza	(Maxim.) Kom.
Angiospermae	Poaceae	Glyceria	Glyceria lithuanica	(Gorski) Gorski	*
Angiospermae	Poaceae	Glyceria	Glyceria spiculosa	(J.A.Schmidt) Roshev. ex B.Fedtsch.
Angiospermae	Poaceae	Schizachne	Schizachne purpurascens subsp. callosa	(Turcz. ex Griseb.) T.Koyama & Kawano
Angiospermae	Poaceae	Melica	Melica grandiflora	Koidz.
Angiospermae	Poaceae	Melica	Melica nutans	L.
Angiospermae	Poaceae	Melica	Melica scabrosa	Trin.
Angiospermae	Poaceae	Melica	Melica turczaninowiana	Ohwi
Angiospermae	Poaceae	Stipa	Stipa baicalensis	Roshev.
Angiospermae	Poaceae	Stipa	Stipa pekinensis	Hance
Angiospermae	Poaceae	Stipa	Stipa sibirica	(L.) Lam.
Angiospermae	Poaceae	Diarrhena	Diarrhena fauriei	(Hack.) Ohwi
Angiospermae	Poaceae	Diarrhena	Diarrhena mandshurica	Maxim.
Angiospermae	Poaceae	Brachypodium	Brachypodium sylvaticum	(Huds.) P.Beauv.	*
Angiospermae	Poaceae	Bromus	Bromus inermis	Leyss.
Angiospermae	Poaceae	Bromus	Bromus pumpellianus	Scribn.
Angiospermae	Poaceae	Bromus	Bromus richardsonii	Link	*
Angiospermae	Poaceae	Hordeum	Hordeum brevisubulatum	(Trin.) Link
Angiospermae	Poaceae	Hordeum	Hordeum vulgare	L.	*
Angiospermae	Poaceae	Elymus	Elymus ciliaris	(Trin.) Tzvelev
Angiospermae	Poaceae	Elymus	Elymus dahuricus	Griseb.
Angiospermae	Poaceae	Elymus	Elymus gmelinii	(Ledeb.) Tzvelev
Angiospermae	Poaceae	Elymus	Elymus gmelinii var. macratherus	(Ohwi) S.L. Chen & G.H. Zhu	*
Angiospermae	Poaceae	Elymus	Elymus kamoji	(Ohwi) S. L. Chen	*
Angiospermae	Poaceae	Elymus	Elymus pendulinus	(Nevski) Tzvelev
Angiospermae	Poaceae	Elymus	Elymus repens	(L.) Gould
Angiospermae	Poaceae	Elymus	Elymus sibiricus	L.
Angiospermae	Poaceae	Hystrix	Hystrix komarovii	(Roshev.) Ohwi
Angiospermae	Poaceae	Leymus	Leymus chinensis	(Trin.) Tzvelev
Angiospermae	Poaceae	Phalaris	Phalaris arundinacea	L.
Angiospermae	Poaceae	Agrostis	Agrostis clavata	Trin.
Angiospermae	Poaceae	Agrostis	Agrostis divaricatissima	Mez	*
Angiospermae	Poaceae	Agrostis	Agrostis gigantea	Roth
Angiospermae	Poaceae	Agrostis	Agrostis macrathera	Phil.	*
Angiospermae	Poaceae	Agrostis	Agrostis stolonifera	L.
Angiospermae	Poaceae	Agrostis	Agrostis vinealis	Schreb.
Angiospermae	Poaceae	Calamagrostis	Calamagrostis arundinacea	(L.) Roth
Angiospermae	Poaceae	Calamagrostis	Calamagrostis emodensis	Griseb.	*
Angiospermae	Poaceae	Calamagrostis	Calamagrostis epigejos	(L.) Roth
Angiospermae	Poaceae	Calamagrostis	Calamagrostis korotkyi	Litv.
Angiospermae	Poaceae	Calamagrostis	Calamagrostis pseudophragmites	(Haller f.) Koeler
Angiospermae	Poaceae	Calamagrostis	Calamagrostis purpurea	(Trin.) Trin.
Angiospermae	Poaceae	Calamagrostis	Calamagrostis stricta	(Timm) Koeler
Angiospermae	Poaceae	Deyeuxia	Deyeuxia angustifolia	Vickery
Angiospermae	Poaceae	Hierochloe	Hierochloe glabra	Trin.
Angiospermae	Poaceae	Hierochloe	Hierochloe odorata	(L.) P.Beauv.
Angiospermae	Poaceae	Trisetum	Trisetum sibiricum	Rupr.
Angiospermae	Poaceae	Trisetum	Trisetum spicatum	(L.) K.Richt.
Angiospermae	Poaceae	Koeleria	Koeleria macrantha	(Ledeb.) Schult.
Angiospermae	Poaceae	Helictotrichon	Helictotrichon altius	(Hitchc.) Ohwi
Angiospermae	Poaceae	Helictotrichon	Helictotrichon dahuricum	(Kom.) Kitag.
Angiospermae	Poaceae	Helictotrichon	Helictotrichon hookeri	(Scribn.) Henrard
Angiospermae	Poaceae	Avena	Avena fatua	L.	*new gene
Angiospermae	Poaceae	Avena	Avena sativa	L.	*new gene+
Angiospermae	Poaceae	Festuca	Festuca dahurica	(St.-Yves) Krecz. & Bobrov
Angiospermae	Poaceae	Festuca	Festuca extremiorientalis	Ohwi
Angiospermae	Poaceae	Festuca	Festuca jacutica	Drobow
Angiospermae	Poaceae	Festuca	Festuca japonica	Makino	*
Angiospermae	Poaceae	Festuca	Festuca ovina	L.	*
Angiospermae	Poaceae	Festuca	Festuca parvigluma	Steud.	*
Angiospermae	Poaceae	Festuca	Festuca pratensis	Huds.
Angiospermae	Poaceae	Festuca	Festuca rubra	L.
Angiospermae	Poaceae	Lolium	Lolium temulentum	L.	*new gene
Angiospermae	Poaceae	Puccinellia	Puccinellia hauptiana	(Krecz.) Kitag.
Angiospermae	Poaceae	Puccinellia	Puccinellia kobayashii	Ohwi	*
Angiospermae	Poaceae	Puccinellia	Puccinellia micrandra	(Keng) Keng f. & S.L.Chen
Angiospermae	Poaceae	Cinna	Cinna latifolia	(Trevir.) Griseb.
Angiospermae	Poaceae	Alopecurus	Alopecurus aequalis	Sobol.
Angiospermae	Poaceae	Alopecurus	Alopecurus arundinaceus	Poir.
Angiospermae	Poaceae	Alopecurus	Alopecurus brachystachyus	M.Bieb.
Angiospermae	Poaceae	Alopecurus	Alopecurus longiaristatus	Maxim.	*
Angiospermae	Poaceae	Alopecurus	Alopecurus magellanicus	Lam.	*
Angiospermae	Poaceae	Beckmannia	Beckmannia syzigachne	(Steud.) Fernald
Angiospermae	Poaceae	Milium	Milium effusum	L.
Angiospermae	Poaceae	Poa	Poa acroleuca	Steud.	*
Angiospermae	Poaceae	Poa	Poa alta	Hitchc.
Angiospermae	Poaceae	Poa	Poa angustifolia	L.
Angiospermae	Poaceae	Poa	Poa annua	L.
Angiospermae	Poaceae	Poa	Poa nemoralis	L.
Angiospermae	Poaceae	Poa	Poa palustris	L.
Angiospermae	Poaceae	Poa	Poa pratensis	L.
Angiospermae	Poaceae	Poa	Poa sibirica	Roshev.
Angiospermae	Poaceae	Poa	Poa sphondylodes	Trin.
Angiospermae	Poaceae	Poa	Poa subfastigiata	Trin. ex Ledeb.
Angiospermae	Poaceae	Poa	Poa versicolor Bess. subsp. stepposa (Krylov) Tzvel.	Besser
Angiospermae	Poaceae	Phragmites	Phragmites australis	(Cav.) Trin. ex Steud.
Angiospermae	Poaceae	Eragrostis	Eragrostis minor	Host	*
Angiospermae	Poaceae	Eragrostis	Eragrostis pilosa	(L.) P.Beauv.
Angiospermae	Poaceae	Chloris	Chloris virgata	Sw.
Angiospermae	Poaceae	Tripogon	Tripogon chinensis	(Franch.) Hack.
Angiospermae	Poaceae	Cleistogenes	Cleistogenes caespitosa	Keng	*new gene
Angiospermae	Poaceae	Cleistogenes	Cleistogenes polyphylla	Keng f.	*new gene+
Angiospermae	Poaceae	Digitaria	Digitaria ischaemum	(Schreb.) Muhl.
Angiospermae	Poaceae	Echinochloa	Echinochloa crus-galli	(L.) P.Beauv.
Angiospermae	Poaceae	Echinochloa	Echinochloa oryzoides	(Ard.) Fritsch	*
Angiospermae	Poaceae	Setaria	Setaria faberi	R.A.W.Herrm.
Angiospermae	Poaceae	Setaria	Setaria viridis	(L.) P.Beauv.
Angiospermae	Poaceae	Pennisetum	Pennisetum flaccidum	Griseb.	*
Angiospermae	Poaceae	Pennisetum	Pennisetum glaucum	(L.) R.Br.	*
Angiospermae	Poaceae	Arundinella	Arundinella hirta	(Thunb.) Tanaka
Angiospermae	Poaceae	Miscanthus	Miscanthus sacchariflorus	(Maxim.) Hack.
Angiospermae	Poaceae	Arthraxon	Arthraxon hispidus	(Thunb.) Makino	*new gene
Angiospermae	Poaceae	Spodiopogon	Spodiopogon sibiricus	Trin.
Angiospermae	Ceratophyllaceae	Ceratophyllum	Ceratophyllum demersum	L.	*
Angiospermae	Ceratophyllaceae	Ceratophyllum	Ceratophyllum platyacanthum subsp. oryzetorum	(Kom.) Les
Angiospermae	Papaveraceae	Papaver	Papaver amurense	(N. Busch) N. Busch ex Tolm.
Angiospermae	Papaveraceae	Papaver	Papaver nudicaule	L.
Angiospermae	Papaveraceae	Papaver	Papaver nudicaule f. seticarpum (P.Y. Fu) H. Chuang	(N. Busch) N. Busch ex Tolm.
Angiospermae	Papaveraceae	Papaver	Papaver nudicaule var. aquilegioides	Fedde
Angiospermae	Papaveraceae	Hylomecon	Hylomecon japonica	(Thunb.) Prantl & Kündig
Angiospermae	Papaveraceae	Hylomecon	Hylomecon vernalis	Maxim.	*
Angiospermae	Papaveraceae	Chelidonium	Chelidonium majus	L.
Angiospermae	Papaveraceae	Adlumia	Adlumia asiatica	Ohwi
Angiospermae	Papaveraceae	Corydalis	Corydalis × gigantea	Trautv. & C.A.Mey.
Angiospermae	Papaveraceae	Corydalis	Corydalis ambigua	Cham. & Schltdl.
Angiospermae	Papaveraceae	Corydalis	Corydalis buschii	Nakai	*
Angiospermae	Papaveraceae	Corydalis	Corydalis lineariloba	Siebold & Zucc.	*
Angiospermae	Papaveraceae	Corydalis	Corydalis ochotensis	Turcz.
Angiospermae	Papaveraceae	Corydalis	Corydalis pallida	(Thunb.) Pers.
Angiospermae	Papaveraceae	Corydalis	Corydalis raddeana	Regel
Angiospermae	Papaveraceae	Corydalis	Corydalis repens	Mandl & Muhldorf	*
Angiospermae	Papaveraceae	Corydalis	Corydalis speciosa	Maxim. ex Regel	*
Angiospermae	Papaveraceae	Corydalis	Corydalis turtschaninovii	Besser
Angiospermae	Papaveraceae	Corydalis	Corydalis yanhusuo	(Y.H.Chou & Chun C.Hsu) W.T.Wang ex Z.Y.Su & C.Y.Wu	*
Angiospermae	Menispermaceae	Menispermum	Menispermum dauricum	DC.
Angiospermae	Berberidaceae	Caulophyllum	Caulophyllum robustum	Maxim.
Angiospermae	Berberidaceae	Berberis	Berberis amurensis	Rupr.
Angiospermae	Berberidaceae	Epimedium	Epimedium koreanum	Nakai	*new gene
Angiospermae	Ranunculaceae	Thalictrum	Thalictrum aquilegiifolium var. sibiricum	Regel & Tiling
Angiospermae	Ranunculaceae	Thalictrum	Thalictrum baicalense	Turcz. ex Ledeb.
Angiospermae	Ranunculaceae	Thalictrum	Thalictrum filamentosum	Maxim.	*
Angiospermae	Ranunculaceae	Thalictrum	Thalictrum foetidum	L.	*
Angiospermae	Ranunculaceae	Thalictrum	Thalictrum ichangense var. coreanum	(H. Lév.) H. Lév. ex Tamura
Angiospermae	Ranunculaceae	Thalictrum	Thalictrum minus	L.	*
Angiospermae	Ranunculaceae	Thalictrum	Thalictrum minus var. hypoleucum	(Siebold & Zucc.) Miq.
Angiospermae	Ranunculaceae	Thalictrum	Thalictrum petaloideum	L.	*
Angiospermae	Ranunculaceae	Thalictrum	Thalictrum petaloideum var. supradecompositum	(Nakai) Kitag.
Angiospermae	Ranunculaceae	Thalictrum	Thalictrum simplex	L.
Angiospermae	Ranunculaceae	Thalictrum	Thalictrum simplex var. affine	(Ledeb.) Regel	*
Angiospermae	Ranunculaceae	Thalictrum	Thalictrum sparsiflorum	Turcz. ex Fisch. & C.A. Mey.
Angiospermae	Ranunculaceae	Thalictrum	Thalictrum squarrosum	Stephan ex Willd.
Angiospermae	Ranunculaceae	Thalictrum	Thalictrum tuberiferum	Maxim.
Angiospermae	Ranunculaceae	Leptopyrum	Leptopyrum fumarioides	(L.) Rchb.	*new gene
Angiospermae	Ranunculaceae	Aquilegia	Aquilegia flabellata	Siebold & Zucc.	*
Angiospermae	Ranunculaceae	Aquilegia	Aquilegia oxysepala	Trautv. & C.A.Mey.
Angiospermae	Ranunculaceae	Aquilegia	Aquilegia parviflora	Ledeb.
Angiospermae	Ranunculaceae	Aquilegia	Aquilegia viridiflora	Pall.
Angiospermae	Ranunculaceae	Aquilegia	Aquilegia viridiflora var. atropurpurea	(Willd.) Trevir.	*
Angiospermae	Ranunculaceae	Aquilegia	Aquilegia yabeana	Kitag.	*
Angiospermae	Ranunculaceae	Enemion	Enemion raddeanum	Regel
Angiospermae	Ranunculaceae	Adonis	Adonis amurensis	Regel & Radde
Angiospermae	Ranunculaceae	Adonis	Adonis ramosa	Franch.	*
Angiospermae	Ranunculaceae	Trollius	Trollius asiaticus	L.	*
Angiospermae	Ranunculaceae	Trollius	Trollius chinensis	Bunge
Angiospermae	Ranunculaceae	Trollius	Trollius japonicus	Miq.	*
Angiospermae	Ranunculaceae	Trollius	Trollius ledebourii	Rchb.	*
Angiospermae	Ranunculaceae	Trollius	Trollius ledebourii	Rchb.
Angiospermae	Ranunculaceae	Aconitum	Aconitum alboviolaceum	Kom.
Angiospermae	Ranunculaceae	Aconitum	Aconitum ambiguum	Rchb.
Angiospermae	Ranunculaceae	Aconitum	Aconitum barbatum	Patrin ex Pers.
Angiospermae	Ranunculaceae	Aconitum	Aconitum birobidshanicum	Vorosch.
Angiospermae	Ranunculaceae	Aconitum	Aconitum coreanum	(H.Lév.) Rapaics
Angiospermae	Ranunculaceae	Aconitum	Aconitum fischeri	Rchb.
Angiospermae	Ranunculaceae	Aconitum	Aconitum fischeri var. arcuatum	(Maxim.) Regel
Angiospermae	Ranunculaceae	Aconitum	Aconitum jaluense	Kom.	*
Angiospermae	Ranunculaceae	Aconitum	Aconitum jaluense var. glabrescens	Nakai
Angiospermae	Ranunculaceae	Aconitum	Aconitum kirinense	Nakai
Angiospermae	Ranunculaceae	Aconitum	Aconitum kusnezoffii	Rchb.
Angiospermae	Ranunculaceae	Aconitum	Aconitum kusnezoffii var. gibbiferum	(Rchb.) Regel	*
Angiospermae	Ranunculaceae	Aconitum	Aconitum longecassidatum	Nakai	*
Angiospermae	Ranunculaceae	Aconitum	Aconitum macrorhynchum	Turcz. ex Ledeb.
Angiospermae	Ranunculaceae	Aconitum	Aconitum monanthum	Nakai	*
Angiospermae	Ranunculaceae	Aconitum	Aconitum paniculigerum	Nakai	*
Angiospermae	Ranunculaceae	Aconitum	Aconitum raddeanum	Regel
Angiospermae	Ranunculaceae	Aconitum	Aconitum septentrionale	Koelle	*
Angiospermae	Ranunculaceae	Aconitum	Aconitum sczukinii	Turcz.
Angiospermae	Ranunculaceae	Aconitum	Aconitum tschangbaischanense	S.H.Li & Y.H.Huang	*
Angiospermae	Ranunculaceae	Aconitum	Aconitum umbrosum	(Korsh.) Kom.
Angiospermae	Ranunculaceae	Aconitum	Aconitum volubile	Pall. ex Koelle
Angiospermae	Ranunculaceae	Delphinium	Delphinium crassifolium	Schrad. ex Spreng.
Angiospermae	Ranunculaceae	Delphinium	Delphinium grandiflorum	L.
Angiospermae	Ranunculaceae	Delphinium	Delphinium maackianum	Regel
Angiospermae	Ranunculaceae	Eranthis	Eranthis stellata	Maxim.
Angiospermae	Ranunculaceae	Actaea	Actaea asiatica	H.Hara
Angiospermae	Ranunculaceae	Actaea	Actaea dahurica	(Turcz. ex Fisch. & C.A.Mey.) Franch.
Angiospermae	Ranunculaceae	Actaea	Actaea heracleifolia	(Kom.) J.Compton
Angiospermae	Ranunculaceae	Actaea	Actaea rubra	(Aiton) Willd.
Angiospermae	Ranunculaceae	Actaea	Actaea simplex	(DC.) Wormsk. ex Prantl
Angiospermae	Ranunculaceae	Caltha	Caltha natans	Pall.
Angiospermae	Ranunculaceae	Caltha	Caltha palustris	L.	*
Angiospermae	Ranunculaceae	Caltha	Caltha palustris var. membranacea	Turcz.
Angiospermae	Ranunculaceae	Caltha	Caltha palustris var. sibirica	Regel
Angiospermae	Ranunculaceae	Anemone	Anemone amurensis	(Korsh.) Kom.
Angiospermae	Ranunculaceae	Anemone	Anemone baicalensis	Turcz.
Angiospermae	Ranunculaceae	Anemone	Anemone baicalensis var. glabrata	Maxim.
Angiospermae	Ranunculaceae	Anemone	Anemone cathayensis	Kitag.	*
Angiospermae	Ranunculaceae	Anemone	Anemone chinensis	Bunge
Angiospermae	Ranunculaceae	Anemone	Anemone dichotoma	L.
Angiospermae	Ranunculaceae	Anemone	Anemone hepatica var. japonica	(Nakai) Ohwi	*
Angiospermae	Ranunculaceae	Anemone	Anemone patens subsp. multifida	(Pritz.) Hultén
Angiospermae	Ranunculaceae	Anemone	Anemone raddeana	Regel	*
Angiospermae	Ranunculaceae	Anemone	Anemone stolonifera	Maxim.	*
Angiospermae	Ranunculaceae	Anemone	Anemone sylvestris	L.
Angiospermae	Ranunculaceae	Anemone	Anemone udensis	Trautv. & C.A.Mey.
Angiospermae	Ranunculaceae	Anemone	Anemone umbrosa	C.A.Mey.	*
Angiospermae	Ranunculaceae	Pulsatilla	Pulsatilla cernua	(Thunb.) Bercht. ex J. Presl
Angiospermae	Ranunculaceae	Pulsatilla	Pulsatilla turczaninovii	Krylov & Serg.	*
Angiospermae	Ranunculaceae	Clematis	Clematis aethusifolia	Turcz.	*
Angiospermae	Ranunculaceae	Clematis	Clematis alpina subsp. ochotensis	(Pall.) Kuntze
Angiospermae	Ranunculaceae	Clematis	Clematis alpina subsp. sibirica	(L.) Kuntze
Angiospermae	Ranunculaceae	Clematis	Clematis brevicaudata	DC.
Angiospermae	Ranunculaceae	Clematis	Clematis fusca	Turcz.
Angiospermae	Ranunculaceae	Clematis	Clematis heracleifolia	DC.	*
Angiospermae	Ranunculaceae	Clematis	Clematis hexapetala	Pall.
Angiospermae	Ranunculaceae	Clematis	Clematis intricata	Bunge	*
Angiospermae	Ranunculaceae	Clematis	Clematis macropetala	Ledeb.	*
Angiospermae	Ranunculaceae	Clematis	Clematis macropetala var. albiflora	(Maxim. ex Kuntze) Hand.-Mazz.	*
Angiospermae	Ranunculaceae	Clematis	Clematis nobilis	Nakai	*
Angiospermae	Ranunculaceae	Clematis	Clematis pinnata	Maxim.	*
Angiospermae	Ranunculaceae	Clematis	Clematis serratifolia	Rehder	*
Angiospermae	Ranunculaceae	Clematis	Clematis terniflora var. manshurica	(Rupr.) Ohwi
Angiospermae	Ranunculaceae	Ranunculus	Ranunculus amurensis	Kom.
Angiospermae	Ranunculaceae	Ranunculus	Ranunculus cantoniensis	DC.
Angiospermae	Ranunculaceae	Ranunculus	Ranunculus cuneifolius	Maxim.	*
Angiospermae	Ranunculaceae	Ranunculus	Ranunculus gmelinii	DC.
Angiospermae	Ranunculaceae	Ranunculus	Ranunculus japonicus	Thunb.
Angiospermae	Ranunculaceae	Ranunculus	Ranunculus japonicus var. hsinganensis	(Kitag.) W.T. Wang	*
Angiospermae	Ranunculaceae	Ranunculus	Ranunculus japonicus var. propinquus	(C.A. Mey.) W.T. Wang
Angiospermae	Ranunculaceae	Ranunculus	Ranunculus monophyllus	Ovcz.	*
Angiospermae	Ranunculaceae	Ranunculus	Ranunculus natans	C.A.Mey.
Angiospermae	Ranunculaceae	Ranunculus	Ranunculus repens	L.
Angiospermae	Ranunculaceae	Ranunculus	Ranunculus sceleratus	L.
Angiospermae	Ranunculaceae	Ranunculus	Ranunculus smirnovii	Ovcz.	*
Angiospermae	Ranunculaceae	Ranunculus	Ranunculus trichophyllus	Chaix ex Vill.
Angiospermae	Ranunculaceae	Ranunculus	Ranunculus trichophyllus subsp. eradicatus	(Laest.) C.D.K.Cook	*
Angiospermae	Ranunculaceae	Ranunculus	Ranunculus ussuriensis	Kom.
Angiospermae	Ranunculaceae	Batrachium	Batrachium kauffmanii	(Clerc) Krecz.	*new gene
Angiospermae	Paeoniaceae	Paeonia	Paeonia lactiflora	Pall.
Angiospermae	Paeoniaceae	Paeonia	Paeonia obovata	Maxim.
Angiospermae	Grossulariaceae	Ribes	Ribes burejense	F. Schmidt	*
Angiospermae	Grossulariaceae	Ribes	Ribes dauricum	Georgi
Angiospermae	Grossulariaceae	Ribes	Ribes giraldii	Jancz.	*
Angiospermae	Grossulariaceae	Ribes	Ribes horridum	Rupr. ex Maxim.
Angiospermae	Grossulariaceae	Ribes	Ribes komarovii	Pojark.	*
Angiospermae	Grossulariaceae	Ribes	Ribes mandshuricum	(Maxim.) Kom.
Angiospermae	Grossulariaceae	Ribes	Ribes mandshuricum var. subglabrum	Kom.	*
Angiospermae	Grossulariaceae	Ribes	Ribes maximowiczianum	Kom.
Angiospermae	Grossulariaceae	Ribes	Ribes nigrum	L.	*
Angiospermae	Grossulariaceae	Ribes	Ribes procumbens	Pall.	*
Angiospermae	Grossulariaceae	Ribes	Ribes spicatum	Robson
Angiospermae	Grossulariaceae	Ribes	Ribes triste	Pall.
Angiospermae	Grossulariaceae	Ribes	Ribes ussuriense	Jancz.	*
Angiospermae	Saxifragaceae	Saxifraga	Saxifraga bronchialis	L.
Angiospermae	Saxifragaceae	Saxifraga	Saxifraga laciniata	Nakai & Takeda	*
Angiospermae	Saxifragaceae	Saxifraga	Saxifraga manshuriensis	(Engl.) Kom.	*
Angiospermae	Saxifragaceae	Saxifraga	Saxifraga punctata	L.
Angiospermae	Saxifragaceae	Saxifraga	Saxifraga sibirica	L.
Angiospermae	Saxifragaceae	Saxifraga	Saxifraga stolonifera	Curtis	*
Angiospermae	Saxifragaceae	Astilbe	Astilbe rubra	Hook.f. & Thomson
Angiospermae	Saxifragaceae	Mitella	Mitella nuda	L.
Angiospermae	Saxifragaceae	Astilboides	Astilboides tabularis	(Hemsl.) Engl.	*new gene
Angiospermae	Saxifragaceae	Mukdenia	Mukdenia acanthifolia	Nakai	*new gene
Angiospermae	Saxifragaceae	Chrysosplenium	Chrysosplenium alternifolium	L.
Angiospermae	Saxifragaceae	Chrysosplenium	Chrysosplenium flagelliferum	F.Schmidt
Angiospermae	Saxifragaceae	Chrysosplenium	Chrysosplenium lectus-cochleae	Kitag.	*
Angiospermae	Saxifragaceae	Chrysosplenium	Chrysosplenium pilosum	Maxim.
Angiospermae	Saxifragaceae	Chrysosplenium	Chrysosplenium pilosum var. valdepilosum	Ohwi	*
Angiospermae	Saxifragaceae	Chrysosplenium	Chrysosplenium ramosum	Maxim.
Angiospermae	Saxifragaceae	Chrysosplenium	Chrysosplenium serreanum	Hand.-Mazz.	*
Angiospermae	Saxifragaceae	Chrysosplenium	Chrysosplenium sinicum	Maxim.
Angiospermae	Crassulaceae	Orostachys	Orostachys cartilaginea	V.N. Boriss.
Angiospermae	Crassulaceae	Orostachys	Orostachys malacophylla	(Pall.) Fisch.
Angiospermae	Crassulaceae	Orostachys	Orostachys spinosa	(L.) Sweet
Angiospermae	Crassulaceae	Hylotelephium	Hylotelephium pallescens	(Freyn) H. Ohba
Angiospermae	Crassulaceae	Hylotelephium	Hylotelephium spectabile	(Boreau) H. Ohba	*
Angiospermae	Crassulaceae	Phedimus	Phedimus aizoon var. latifolius	(Maxim.) H. Ohba, K.T. Fu & B.M. Barthol.
Angiospermae	Crassulaceae	Phedimus	Phedimus hsinganicus	(Y.C. Chu ex S.H. Fu & Y. Hui Huang) H. Ohba, K.T. Fu & B.M. Barthol.	*
Angiospermae	Crassulaceae	Sedum	Sedum aizoon	L.
Angiospermae	Crassulaceae	Sedum	Sedum fedtschenckoi	Raym.-Hamet	*
Angiospermae	Crassulaceae	Sedum	Sedum kamtschaticum	Fisch.	*
Angiospermae	Crassulaceae	Sedum	Sedum pallescens	Freyn	*
Angiospermae	Crassulaceae	Sedum	Sedum roseum	(L.) Scop.	*
Angiospermae	Crassulaceae	Sedum	Sedum telephium	L.	*
Angiospermae	Crassulaceae	Crassula	Crassula aquatica	(L.) Schönland
Angiospermae	Penthoraceae	Penthorum	Penthorum chinense	Pursh
Angiospermae	Haloragaceae	Myriophyllum	Myriophyllum spicatum	L.	*
Angiospermae	Haloragaceae	Myriophyllum	Myriophyllum verticillatum	L.
Angiospermae	Vitaceae	Ampelopsis	Ampelopsis glandulosa var. brevipedunculata	(Maxim.) Momiy.	*new gene
Angiospermae	Vitaceae	Ampelopsis	Ampelopsis glandulosa var. heterophylla	(Thunb.) Momiy.	*new gene+
Angiospermae	Vitaceae	Vitis	Vitis amurensis	Rupr.
Angiospermae	Zygophyllaceae	Tribulus	Tribulus terrestris	L.	*new family
Angiospermae	Fabaceae	Maackia	Maackia amurensis	Rupr.
Angiospermae	Fabaceae	Sophora	Sophora flavescens	Aiton
Angiospermae	Fabaceae	Kummerowia	Kummerowia stipulacea	(Maxim.) Makino
Angiospermae	Fabaceae	Lespedeza	Lespedeza bicolor	Turcz.
Angiospermae	Fabaceae	Lespedeza	Lespedeza cyrtobotrya	Miq.	*
Angiospermae	Fabaceae	Lespedeza	Lespedeza davurica	(Laxm.) Schindl.
Angiospermae	Fabaceae	Lespedeza	Lespedeza floribunda	Bunge	*
Angiospermae	Fabaceae	Lespedeza	Lespedeza inschanica	(Maxim.) Schindl.
Angiospermae	Fabaceae	Lespedeza	Lespedeza juncea	(L.f.) Pers.
Angiospermae	Fabaceae	Desmodium	Desmodium oldhamii	Oliv.	*
Angiospermae	Fabaceae	Hylodesmum	Hylodesmum oxyphyllum	(DC.) X.F. Gao	*new gene
Angiospermae	Fabaceae	Glycine	Glycine max	(L.) Merr.	*
Angiospermae	Fabaceae	Glycine	Glycine max subsp. soja	(Siebold & Zucc.) H.Ohashi
Angiospermae	Fabaceae	Amphicarpaea	Amphicarpaea bracteata subsp. edgeworthii	(Benth.) H.Ohashi(Benth.) H.Ohashi
Angiospermae	Fabaceae	Glycyrrhiza	Glycyrrhiza pallidiflora	Maxim.	*new gene
Angiospermae	Fabaceae	Hedysarum	Hedysarum vicioides	Turcz.	*new gene
Angiospermae	Fabaceae	Oxytropis	Oxytropis hailarensis	Kitag.	*new gene
Angiospermae	Fabaceae	Astragalus	Astragalus adsurgens	Pall.
Angiospermae	Fabaceae	Astragalus	Astragalus chinensis	L.f.	*
Angiospermae	Fabaceae	Astragalus	Astragalus complanatus	Bunge	*
Angiospermae	Fabaceae	Astragalus	Astragalus filiformis	(DC.) Poir.	*
Angiospermae	Fabaceae	Astragalus	Astragalus galactites	Pall.	*
Angiospermae	Fabaceae	Astragalus	Astragalus monbeigii	G.Simpson	*
Angiospermae	Fabaceae	Astragalus	Astragalus penduliflorus	Lam.	*
Angiospermae	Fabaceae	Astragalus	Astragalus propinquus	Schischkin
Angiospermae	Fabaceae	Astragalus	Astragalus uliginosus	L.
Angiospermae	Fabaceae	Medicago	Medicago falcata	L.
Angiospermae	Fabaceae	Medicago	Medicago liaosiensis	(P.Y. Fu & Y.A. Chen) X.Y. Zhu & Y.F. Du
Angiospermae	Fabaceae	Medicago	Medicago lupulina	L.
Angiospermae	Fabaceae	Melilotus	Melilotus albus	Medik.	*new gene
Angiospermae	Fabaceae	Melilotus	Melilotus dentatus	(Waldst. & Kit.) Pers.	*new gene+
Angiospermae	Fabaceae	Melilotus	Melilotus suaveolens	Ledeb.
Angiospermae	Fabaceae	Trifolium	Trifolium hybridum	L.	*
Angiospermae	Fabaceae	Trifolium	Trifolium lupinaster	L.
Angiospermae	Fabaceae	Trifolium	Trifolium pratense	L.	*
Angiospermae	Fabaceae	Trifolium	Trifolium repens		*
Angiospermae	Fabaceae	Vicia	Vicia amoena	Fisch.
Angiospermae	Fabaceae	Vicia	Vicia amurensis	Oett.
Angiospermae	Fabaceae	Vicia	Vicia cracca	L.
Angiospermae	Fabaceae	Vicia	Vicia cracca	L.	*
Angiospermae	Fabaceae	Vicia	Vicia japonica	A.Gray
Angiospermae	Fabaceae	Vicia	Vicia multicaulis	Ledeb.	*
Angiospermae	Fabaceae	Vicia	Vicia ohwiana	Hosok.	*
Angiospermae	Fabaceae	Vicia	Vicia pseudo-orobus	Fisch. & C.A.Mey.
Angiospermae	Fabaceae	Vicia	Vicia ramuliflora	(Maxim.) Ohwi
Angiospermae	Fabaceae	Vicia	Vicia unijuga	A.Br.
Angiospermae	Fabaceae	Vicia	Vicia venosa	(Link) Maxim.
Angiospermae	Fabaceae	Vicia	Vicia venosa	(Link) Maxim.	*
Angiospermae	Fabaceae	Vicia	Vicia tenuifolia	Roth	*
Angiospermae	Fabaceae	Lathyrus	Lathyrus davidii	Hance
Angiospermae	Fabaceae	Lathyrus	Lathyrus humilis	(Ser.) Spreng.
Angiospermae	Fabaceae	Lathyrus	Lathyrus komarovii	Ohwi
Angiospermae	Fabaceae	Lathyrus	Lathyrus palustris	L.
Angiospermae	Fabaceae	Lathyrus	Lathyrus quinquenervius	(Miq.) Litv.	*
Angiospermae	Fabaceae	Lathyrus	Lathyrus vaniotii	H.Lev.	*
Angiospermae	Polygalaceae	Polygala	Polygala sibirica	L.
Angiospermae	Polygalaceae	Polygala	Polygala tenuifolia	Willd.
Angiospermae	Rosaceae	Filipendula	Filipendula angustiloba	(Turcz. ex Fisch., C.A.Mey & Avâ€š-Lall.) Maxim.
Angiospermae	Rosaceae	Filipendula	Filipendula glaberrima	Nakai	*
Angiospermae	Rosaceae	Filipendula	Filipendula palmata	(Pall.) Maxim.
Angiospermae	Rosaceae	Filipendula	Filipendula x intermedia	(Glehn) Juz.
Angiospermae	Rosaceae	Filipendula	Filipendula x purpurea	Maxim.
Angiospermae	Rosaceae	Rubus	Rubus arcticus	L.
Angiospermae	Rosaceae	Rubus	Rubus chamaemorus	L.	*
Angiospermae	Rosaceae	Rubus	Rubus crataegifolius	Bunge	*
Angiospermae	Rosaceae	Rubus	Rubus humilifolius	C.A. Meyer	*
Angiospermae	Rosaceae	Rubus	Rubus idaeus	L.
Angiospermae	Rosaceae	Rubus	Rubus idaeus subsp. melanolasius	Dieck ex Focke	*
Angiospermae	Rosaceae	Rubus	Rubus idaeus subsp. strigosus	(Michx.) Focke	*
Angiospermae	Rosaceae	Rubus	Rubus parvifolius	L.	*
Angiospermae	Rosaceae	Rubus	Rubus sachalinensis var. concolor	(Kom.) Lauener & D.K.Ferguson
Angiospermae	Rosaceae	Rubus	Rubus sachalinensis	H. Lév.
Angiospermae	Rosaceae	Rubus	Rubus saxatilis	L.
Angiospermae	Rosaceae	Geum	Geum aleppicum	Jacq.
Angiospermae	Rosaceae	Geum	Geum macrophyllum	Willd.	*
Angiospermae	Rosaceae	Agrimonia	Agrimonia pilosa	Ledeb.
Angiospermae	Rosaceae	Sanguisorba	Sanguisorba × tenuifolia	Fisch. ex Link
Angiospermae	Rosaceae	Sanguisorba	Sanguisorba canadensis	L.	*
Angiospermae	Rosaceae	Sanguisorba	Sanguisorba officinalis	L.
Angiospermae	Rosaceae	Sanguisorba	Sanguisorba officinalis var. longifila	(Kitag.) T.T.Yu & C.L.Li	*
Angiospermae	Rosaceae	Sanguisorba	Sanguisorba × tenuifolia var. grandiflora	Maxim.	*
Angiospermae	Rosaceae	Rosa	Rosa acicularis	Lindl.
Angiospermae	Rosaceae	Rosa	Rosa davurica	Pall.
Angiospermae	Rosaceae	Rosa	Rosa koreana	Kom.
Angiospermae	Rosaceae	Potentilla	Potentilla acaulis	L.	*
Angiospermae	Rosaceae	Potentilla	Potentilla ancistrifolia	Bunge
Angiospermae	Rosaceae	Potentilla	Potentilla ancistrifolia var. dickinsii	(Franch. & Sav.) Koidz.	*
Angiospermae	Rosaceae	Potentilla	Potentilla anserina	L.
Angiospermae	Rosaceae	Potentilla	Potentilla asperrima	Turcz.
Angiospermae	Rosaceae	Potentilla	Potentilla betonicifolia	Poir.
Angiospermae	Rosaceae	Potentilla	Potentilla bifurca var. major	Ledeb.
Angiospermae	Rosaceae	Potentilla	Potentilla centigrana	Maxim.	*
Angiospermae	Rosaceae	Potentilla	Potentilla chinensis	Ser.
Angiospermae	Rosaceae	Potentilla	Potentilla conferta	Bunge
Angiospermae	Rosaceae	Potentilla	Potentilla cryptotaeniae	Maxim.
Angiospermae	Rosaceae	Potentilla	Potentilla discolor	Bunge
Angiospermae	Rosaceae	Potentilla	Potentilla flagellaris	Willd. ex Schltdl.	*
Angiospermae	Rosaceae	Potentilla	Potentilla fragarioides	L.
Angiospermae	Rosaceae	Potentilla	Potentilla freyniana	Bornm.
Angiospermae	Rosaceae	Potentilla	Potentilla hypoleuca	Turcz.
Angiospermae	Rosaceae	Potentilla	Potentilla kleiniana	Wight & Arn.	*
Angiospermae	Rosaceae	Potentilla	Potentilla multifida	L.
Angiospermae	Rosaceae	Potentilla	Potentilla rosulifera	H.Lâ€šv.	*
Angiospermae	Rosaceae	Potentilla	Potentilla simulatrix	Th.Wolf	*
Angiospermae	Rosaceae	Potentilla	Potentilla supina	L.	*
Angiospermae	Rosaceae	Potentilla	Potentilla supina subsp. paradoxa	(Nutt. ex Torr. & A.Gray) Soj k
Angiospermae	Rosaceae	Potentilla	Potentilla supina var. ternata	Peterm.	*
Angiospermae	Rosaceae	Potentilla	Potentilla tanacetifolia	Willd. ex Schltdl.
Angiospermae	Rosaceae	Fragaria	Fragaria chiloensis	(L.) Duchesne ex Weston
Angiospermae	Rosaceae	Fragaria	Fragaria orientalis	Losinsk.
Angiospermae	Rosaceae	Dasiphora	Dasiphora fruticosa	(L.) Rydb.
Angiospermae	Rosaceae	Chamaerhodos	Chamaerhodos erecta	(L.) Bunge
Angiospermae	Rosaceae	Sibbaldia	Sibbaldia adpressa	Bunge	*new gene
Angiospermae	Rosaceae	Sibbaldianthe	Sibbaldianthe bifurca	(L.) Kurtto & T.Erikss.	*new gene
Angiospermae	Rosaceae	Comarum	Comarum palustre	L.
Angiospermae	Rosaceae	Prunus	Prunus armeniaca	L.	*
Angiospermae	Rosaceae	Prunus	Prunus humilis	Bunge	*
Angiospermae	Rosaceae	Prunus	Prunus japonica var. nakaii	(H.Lâ€šv.) Rehder
Angiospermae	Rosaceae	Prunus	Prunus maackii	Rupr.
Angiospermae	Rosaceae	Prunus	Prunus maximowiczii	Rupr.
Angiospermae	Rosaceae	Prunus	Prunus padus	L.
Angiospermae	Rosaceae	Prunus	Prunus padus var. pubescens	Regel & Tiling	*
Angiospermae	Rosaceae	Prunus	Prunus salicina	Lindl.	*
Angiospermae	Rosaceae	Prunus	Prunus serrulata	Lindl.	*
Angiospermae	Rosaceae	Prunus	Prunus sibirica	L.
Angiospermae	Rosaceae	Prunus	Prunus wilsonii	(C.K.Schneid.) Koehne	*
Angiospermae	Rosaceae	Prinsepia	Prinsepia sinensis	(Oliv.) Oliv. ex Bean
Angiospermae	Rosaceae	Sorbaria	Sorbaria sorbifolia	(L.) A.Braun
Angiospermae	Rosaceae	Sorbaria	Sorbaria sorbifolia var. stellipila	Maxim.	*
Angiospermae	Rosaceae	Aruncus	Aruncus dioicus	(Walter) Fernald
Angiospermae	Rosaceae	Spiraea	Spiraea chamaedryfolia	L.
Angiospermae	Rosaceae	Spiraea	Spiraea dahurica	(Rupr.) Maxim.	*
Angiospermae	Rosaceae	Spiraea	Spiraea elegans	Pojark.
Angiospermae	Rosaceae	Spiraea	Spiraea media	Schmidt
Angiospermae	Rosaceae	Spiraea	Spiraea pubescens	Turcz.	*
Angiospermae	Rosaceae	Spiraea	Spiraea salicifolia	L.
Angiospermae	Rosaceae	Spiraea	Spiraea trichocarpa	Nakai	*
Angiospermae	Rosaceae	Crataegus	Crataegus dahurica	Koehne ex C.K.Schneid.
Angiospermae	Rosaceae	Crataegus	Crataegus maximowiczii	C.K.Schneid.
Angiospermae	Rosaceae	Crataegus	Crataegus pinnatifida	Bunge
Angiospermae	Rosaceae	Crataegus	Crataegus pinnatifida var. psilosa	C.K.Schneid.
Angiospermae	Rosaceae	Crataegus	Crataegus sanguinea	Pall.
Angiospermae	Rosaceae	Malus	Malus baccata	(L.) Borkh.
Angiospermae	Rosaceae	Malus	Malus mandshurica	(Maxim.) Kom. ex Juz.	*
Angiospermae	Rosaceae	Malus	Malus manshurica	(Maxim.) Kom. ex Skvortsov
Angiospermae	Rosaceae	Pyrus	Pyrus ussuriensis	Maxim. ex Rupr.
Angiospermae	Rosaceae	Sorbus	Sorbus alnifolia	(Siebold & Zucc.) K.Koch
Angiospermae	Rosaceae	Sorbus	Sorbus alnifolia var. lobulata	(Koidz.) Rehder	*
Angiospermae	Rosaceae	Sorbus	Sorbus aucuparia	L.
Angiospermae	Rhamnaceae	Rhamnus	Rhamnus arguta	Maxim.	*
Angiospermae	Rhamnaceae	Rhamnus	Rhamnus davurica	Pall.
Angiospermae	Rhamnaceae	Rhamnus	Rhamnus diamantiaca	Nakai
Angiospermae	Rhamnaceae	Rhamnus	Rhamnus diamantiaca	Nakai	*
Angiospermae	Rhamnaceae	Rhamnus	Rhamnus parvifolia	Bunge	*
Angiospermae	Rhamnaceae	Rhamnus	Rhamnus ussuriensis	J.J. Vassil.
Angiospermae	Rhamnaceae	Rhamnus	Rhamnus yoshinoi	Makino
Angiospermae	Ulmaceae	Ulmus	Ulmus davidiana	Planch.	*
Angiospermae	Ulmaceae	Ulmus	Ulmus davidiana var. japonica	(Rehder) Nakai
Angiospermae	Ulmaceae	Ulmus	Ulmus laciniata	(Trautv.) Mayr
Angiospermae	Ulmaceae	Ulmus	Ulmus macrocarpa	Hance
Angiospermae	Ulmaceae	Ulmus	Ulmus parvifolia	Jacq.	*
Angiospermae	Ulmaceae	Ulmus	Ulmus pumila	L.	*
Angiospermae	Cannabaceae	Cannabis	Cannabis sativa	L.	*new gene
Angiospermae	Cannabaceae	Humulus	Humulus scandens	(Lour.) Merr.
Angiospermae	Moraceae	Morus	Morus alba	L.	*new family
Angiospermae	Urticaceae	Urtica	Urtica angustifolia	Fisch. ex Hornem.
Angiospermae	Urticaceae	Urtica	Urtica cannabina	L.
Angiospermae	Urticaceae	Urtica	Urtica laetevirens	Maxim.
Angiospermae	Urticaceae	Urtica	Urtica urens	L.	*
Angiospermae	Urticaceae	Laportea	Laportea bulbifera	(Siebold & Zucc.) Wedd.
Angiospermae	Urticaceae	Laportea	Laportea cuspidata	(Wedd.) Friis	*
Angiospermae	Urticaceae	Pilea	Pilea pumila	(L.) A. Gray
Angiospermae	Urticaceae	Pilea	Pilea pumila var. hamaoi	(Makino) C.J. Chen
Angiospermae	Urticaceae	Parietaria	Parietaria debilis	G.Forst.	*new gene
Angiospermae	Fagaceae	Quercus	Quercus dentata	Thunb.	*
Angiospermae	Fagaceae	Quercus	Quercus mongolica	Fisch. ex Ledeb.
Angiospermae	Fagaceae	Quercus	Quercus mongolica subsp. crispula	(Blume) Menitsky
Angiospermae	Fagaceae	Quercus	Quercus wutaishanica	Mayr	*
Angiospermae	Juglandaceae	Juglans	Juglans mandshurica	Maxim.
Angiospermae	Betulaceae	Alnus	Alnus hirsuta	(Spach) Rupr.
Angiospermae	Betulaceae	Betula	Betula chinensis	Maxim.	*
Angiospermae	Betulaceae	Betula	Betula costata	Trautv.
Angiospermae	Betulaceae	Betula	Betula dahurica	Pall.
Angiospermae	Betulaceae	Betula	Betula divaricata	Ledeb.
Angiospermae	Betulaceae	Betula	Betula ermanii	Cham.
Angiospermae	Betulaceae	Betula	Betula fruticosa	Pall.
Angiospermae	Betulaceae	Betula	Betula humilis	Schrank
Angiospermae	Betulaceae	Betula	Betula ovalifolia	Rupr.	*
Angiospermae	Betulaceae	Betula	Betula platyphylla	Sukaczev
Angiospermae	Betulaceae	Betula	Betula schmidtii	Regel	*
Angiospermae	Betulaceae	Corylus	Corylus heterophylla	Fisch. ex Trautv.
Angiospermae	Betulaceae	Corylus	Corylus sieboldiana var. mandshurica	(Maxim.) C.K.Schneid.
Angiospermae	Betulaceae	Ostryopsis	Ostryopsis davidiana	Decne.	*new gene
Angiospermae	Betulaceae	Carpinus	Carpinus cordata	Blume	*new gene
Angiospermae	Cucurbitaceae	Actinostemma	Actinostemma tenerum	Griff.
Angiospermae	Cucurbitaceae	Schizopepon	Schizopepon bryoniifolius	Maxim.
Angiospermae	Celastraceae	Parnassia	Parnassia palustris	L.
Angiospermae	Celastraceae	Parnassia	Parnassia palustris var. multiseta	Ledeb.	*
Angiospermae	Celastraceae	Celastrus	Celastrus flagellaris	Rupr.
Angiospermae	Celastraceae	Celastrus	Celastrus orbiculatus	Thunb.	*
Angiospermae	Celastraceae	Tripterygium	Tripterygium wilfordii	Hook. f.
Angiospermae	Celastraceae	Euonymus	Euonymus alatus	(Thunb.) Siebold
Angiospermae	Celastraceae	Euonymus	Euonymus hamiltonianus	Wall.	*
Angiospermae	Celastraceae	Euonymus	Euonymus maackii	Rupr.
Angiospermae	Celastraceae	Euonymus	Euonymus macropterus	Rupr.
Angiospermae	Celastraceae	Euonymus	Euonymus oxyphyllus	Miq.	*
Angiospermae	Celastraceae	Euonymus	Euonymus rehderianus	Loes.	*
Angiospermae	Celastraceae	Euonymus	Euonymus verrucosus	Scop.
Angiospermae	Oxalidaceae	Oxalis	Oxalis acetosella	L.
Angiospermae	Oxalidaceae	Oxalis	Oxalis griffithii	Edgew. & Hook. f.	*
Angiospermae	Oxalidaceae	Oxalis	Oxalis stricta	L.	*
Angiospermae	Hypericaceae	Hypericum	Hypericum ascyron	L.
Angiospermae	Hypericaceae	Hypericum	Hypericum ascyron subsp. gebleri	(Ledeb.) N.Robson
Angiospermae	Hypericaceae	Hypericum	Hypericum attenuatum	Fisch. ex Choisy
Angiospermae	Hypericaceae	Triadenum	Triadenum japonicum	(Blume) Makino
Angiospermae	Violaceae	Viola	Viola acuminata	Ledeb.
Angiospermae	Violaceae	Viola	Viola arcuata	Blume
Angiospermae	Violaceae	Viola	Viola bangii	Rusby	*
Angiospermae	Violaceae	Viola	Viola biflora	L.	*
Angiospermae	Violaceae	Viola	Viola brachyceras	Turcz.
Angiospermae	Violaceae	Viola	Viola collina	Besser
Angiospermae	Violaceae	Viola	Viola dactyloides	Schult.
Angiospermae	Violaceae	Viola	Viola dissecta	Ledeb.
Angiospermae	Violaceae	Viola	Viola epipsila	Ledeb.
Angiospermae	Violaceae	Viola	Viola gmeliniana	Roem. & Schult.
Angiospermae	Violaceae	Viola	Viola incisa	Turcz.
Angiospermae	Violaceae	Viola	Viola mandshurica	W. Becker
Angiospermae	Violaceae	Viola	Viola mirabilis	L.
Angiospermae	Violaceae	Viola	Viola mongolica	Franch.
Angiospermae	Violaceae	Viola	Viola muehldorfii	Kiss
Angiospermae	Violaceae	Viola	Viola patrinii	Ging.
Angiospermae	Violaceae	Viola	Viola philippica	Cav.	*
Angiospermae	Violaceae	Viola	Viola prionantha	Bunge	*
Angiospermae	Violaceae	Viola	Viola raddeana	Regel
Angiospermae	Violaceae	Viola	Viola rossii	Hemsl.	*
Angiospermae	Violaceae	Viola	Viola sacchalinensis	H.Boissieu
Angiospermae	Violaceae	Viola	Viola selkirkii	Pursh ex Goldie
Angiospermae	Salicaceae	Populus	Populus koreana	Rehder
Angiospermae	Salicaceae	Populus	Populus simonii	Carrière	*
Angiospermae	Salicaceae	Populus	Populus simonii var. liaotungensis	(C. Wang & Skvortsov) C. Wang & S.L. Tung
Angiospermae	Salicaceae	Populus	Populus suaveolens	Fisch. ex Loudon
Angiospermae	Salicaceae	Populus	Populus tremula var. davidiana	(Dode) C.K.Schneid.
Angiospermae	Salicaceae	Salix	Salix arbutifolia	Pall.
Angiospermae	Salicaceae	Salix	Salix babylonica	L.
Angiospermae	Salicaceae	Salix	Salix bebbiana	Sarg.	*
Angiospermae	Salicaceae	Salix	Salix cardiophylla	Trautv. & C.A.Mey.
Angiospermae	Salicaceae	Salix	Salix caspica	Pall.	*
Angiospermae	Salicaceae	Salix	Salix floderusii	Nakai
Angiospermae	Salicaceae	Salix	Salix forrestii	K.S.Hao	*
Angiospermae	Salicaceae	Salix	Salix gmelinii	Pall.
Angiospermae	Salicaceae	Salix	Salix gracilior	(Siuzew) Nakai
Angiospermae	Salicaceae	Salix	Salix gracilistyla	Miq.
Angiospermae	Salicaceae	Salix	Salix hsinganica	Y.L. Chang & Skvortsov
Angiospermae	Salicaceae	Salix	Salix integra	Thunb.
Angiospermae	Salicaceae	Salix	Salix kangensis	Nakai
Angiospermae	Salicaceae	Salix	Salix microstachya	Turcz.	*
Angiospermae	Salicaceae	Salix	Salix miyabeana	Seemen	*
Angiospermae	Salicaceae	Salix	Salix myrtilloides	L.
Angiospermae	Salicaceae	Salix	Salix nipponica	Franch. & Sav.
Angiospermae	Salicaceae	Salix	Salix pentandra	L.
Angiospermae	Salicaceae	Salix	Salix pierotii	Miq.
Angiospermae	Salicaceae	Salix	Salix raddeana	Lacksch. ex Nasarow
Angiospermae	Salicaceae	Salix	Salix rorida	Laksch.
Angiospermae	Salicaceae	Salix	Salix rosmarinifolia	L.
Angiospermae	Salicaceae	Salix	Salix rosmarinifolia var. brachypoda	(Trautv. & C.A. Mey.) Y. L. Chou
Angiospermae	Salicaceae	Salix	Salix rotundifolia	Trautv.	*
Angiospermae	Salicaceae	Salix	Salix schwerinii	E.L.Wolf
Angiospermae	Salicaceae	Salix	Salix skvortzovii	Y.L. Chang & Y.L. Chou
Angiospermae	Salicaceae	Salix	Salix starkeana	Willd.	*
Angiospermae	Salicaceae	Salix	Salix sungkianica	Y.L. Chou & Skvortsov
Angiospermae	Salicaceae	Salix	Salix taraikensis	Kimura
Angiospermae	Salicaceae	Salix	Salix triandra	L.
Angiospermae	Salicaceae	Salix	Salix udensis	Trautv. & C.A.Mey.
Angiospermae	Salicaceae	Salix	Salix viminalis	L.
Angiospermae	Euphorbiaceae	Acalypha	Acalypha australis	L.
Angiospermae	Euphorbiaceae	Euphorbia	Euphorbia esula	L.
Angiospermae	Euphorbiaceae	Euphorbia	Euphorbia esula var. cyparissioides	Boiss.	*
Angiospermae	Euphorbiaceae	Euphorbia	Euphorbia fischeriana	Steud.	*
Angiospermae	Euphorbiaceae	Euphorbia	Euphorbia helioscopia	L.
Angiospermae	Euphorbiaceae	Euphorbia	Euphorbia hirta	L.	*
Angiospermae	Euphorbiaceae	Euphorbia	Euphorbia lucorum	Rupr.
Angiospermae	Euphorbiaceae	Euphorbia	Euphorbia maculata	L.	*
Angiospermae	Euphorbiaceae	Euphorbia	Euphorbia pekinensis	Rupr.	*
Angiospermae	Euphorbiaceae	Euphorbia	Euphorbia pilosa	L.	*
Angiospermae	Euphorbiaceae	Euphorbia	Euphorbia sieboldiana	C.Morren & Decne.	*
Angiospermae	Euphorbiaceae	Euphorbia	Euphorbia thymifolia	L.	*
Angiospermae	Linaceae	Linum	Linum baicalense	Juz.	*
Angiospermae	Linaceae	Linum	Linum perenne	L.	*
Angiospermae	Linaceae	Linum	Linum stelleroides	Planch.
Angiospermae	Linaceae	Linum	Linum usitatissimum	L.	*
Angiospermae	Phyllanthaceae	Flueggea	Flueggea suffruticosa	(Pall.) Baill.
Angiospermae	Phyllanthaceae	Phyllanthus	Phyllanthus urinaria	L.	*new gene
Angiospermae	Phyllanthaceae	Phyllanthus	Phyllanthus ussuriensis	Rupr. & Maxim.	*new gene+
Angiospermae	Geraniaceae	Geranium	Geranium dahuricum	DC.
Angiospermae	Geraniaceae	Geranium	Geranium dahuricum var. paishanense	(Y.L.Chang) C.C.Huang & L.R.Xu	*
Angiospermae	Geraniaceae	Geranium	Geranium erianthum	DC.	*
Angiospermae	Geraniaceae	Geranium	Geranium koreanum	Kom.	*
Angiospermae	Geraniaceae	Geranium	Geranium krameri	Franch. & Sav.	*
Angiospermae	Geraniaceae	Geranium	Geranium maximowiczii	Regel & Maack
Angiospermae	Geraniaceae	Geranium	Geranium platyanthum	Duthie
Angiospermae	Geraniaceae	Geranium	Geranium sibiricum	L.
Angiospermae	Geraniaceae	Geranium	Geranium soboliferum	Kom.
Angiospermae	Geraniaceae	Geranium	Geranium transbaicalicum	Serg.	*
Angiospermae	Geraniaceae	Geranium	Geranium vlassovianum	Fisch. ex Link
Angiospermae	Geraniaceae	Geranium	Geranium wilfordii	Maxim.	*
Angiospermae	Geraniaceae	Erodium	Erodium stephanianum	Willd.
Angiospermae	Lythraceae	Lythrum	Lythrum salicaria	L.
Angiospermae	Lythraceae	Trapa	Trapa natans	L.	*new gene
Angiospermae	Lythraceae	Trapa	Trapa natans var. bispinosa	(Roxb.) Makino	*new gene+
Angiospermae	Onagraceae	Circaea	Circaea alpina	L.
Angiospermae	Onagraceae	Circaea	Circaea alpina subsp. caulescens	(Kom.) Tatew.
Angiospermae	Onagraceae	Circaea	Circaea cordata	Royle
Angiospermae	Onagraceae	Circaea	Circaea lutetiana subsp. quadrisulcata	(Maxim.) Asch. & Magnus
Angiospermae	Onagraceae	Epilobium	Epilobium amurense	Hausskn.	*
Angiospermae	Onagraceae	Epilobium	Epilobium amurense subsp. cephalostigma	(Hausskn.) C.J.Chen, Hoch & P.H.Raven
Angiospermae	Onagraceae	Epilobium	Epilobium angustifolium	L.
Angiospermae	Onagraceae	Epilobium	Epilobium angustifolium subsp. circumvagum	Mosquin	*
Angiospermae	Onagraceae	Epilobium	Epilobium ciliatum	Raf.	*
Angiospermae	Onagraceae	Epilobium	Epilobium fastigiatoramosum	Nakai
Angiospermae	Onagraceae	Epilobium	Epilobium minutiflorum	Hausskn.	*
Angiospermae	Onagraceae	Epilobium	Epilobium palustre	L.
Angiospermae	Onagraceae	Oenothera	Oenothera biennis	L.	*new gene
Angiospermae	Onagraceae	Oenothera	Oenothera villosa	Thunb.	*new gene+
Angiospermae	Sapindaceae	Acer	Acer barbinerve	Maxim. ex Miq.
Angiospermae	Sapindaceae	Acer	Acer caudatum subsp. ukurundense	(Trautv. & C.A.Mey.) E.Murray
Angiospermae	Sapindaceae	Acer	Acer negundo	L.	*
Angiospermae	Sapindaceae	Acer	Acer pictum	Thunb.
Angiospermae	Sapindaceae	Acer	Acer tataricum	L.
Angiospermae	Sapindaceae	Acer	Acer tataricum subsp. ginnala	(Maxim.) Wesm.
Angiospermae	Sapindaceae	Acer	Acer tegmentosum	Maxim.
Angiospermae	Sapindaceae	Acer	Acer truncatum	Bunge	*
Angiospermae	Sapindaceae	Acer	Acer tschonoskii subsp. koreanum	A.E.Murray
Angiospermae	Rutaceae	Dictamnus	Dictamnus albus	L.
Angiospermae	Rutaceae	Phellodendron	Phellodendron amurense	Rupr.
Angiospermae	Malvaceae	Grewia	Grewia biloba var. parviflora	(Bunge) Hand.-Mazz.	*new gene
Angiospermae	Malvaceae	Tilia	Tilia amurensis	Rupr.
Angiospermae	Malvaceae	Tilia	Tilia amurensis var. taquetii	(C.K. Schneid.) Liou & Li
Angiospermae	Malvaceae	Tilia	Tilia mandshurica	Rupr. & Maxim.
Angiospermae	Malvaceae	Tilia	Tilia mongolica	Maxim.	*
Angiospermae	Malvaceae	Tilia	Tilia platyphyllos	Scop.	*
Angiospermae	Malvaceae	Tilia	Tilia sibirica	Bayer
Angiospermae	Malvaceae	Hibiscus	Hibiscus trionum	L.
Angiospermae	Malvaceae	Malva	Malva verticillata	L.
Angiospermae	Malvaceae	Abutilon	Abutilon theophrasti	Medik.
Angiospermae	Thymelaeaceae	Stellera	Stellera chamaejasme	L.
Angiospermae	Brassicaceae	Draba	Draba nemorosa	L.
Angiospermae	Brassicaceae	Arabidopsis	Arabidopsis halleri	(L.) O'Kane & Al-Shehbaz	*new gene
Angiospermae	Brassicaceae	Arabidopsis	Arabidopsis lyrata subsp. kamchatica	(Fisch. ex DC.) O'Kane & Al-Shehbaz	*new gene+
Angiospermae	Brassicaceae	Capsella	Capsella bursa-pastoris	(L.) Medik.
Angiospermae	Brassicaceae	Catolobus	Catolobus pendulus	(L.) Al-Shehbaz
Angiospermae	Brassicaceae	Neslia	Neslia paniculata	(L.) Desv.
Angiospermae	Brassicaceae	Barbarea	Barbarea orthoceras	Ledeb.
Angiospermae	Brassicaceae	Cardamine	Cardamine flexuosa	With.	*
Angiospermae	Brassicaceae	Cardamine	Cardamine komarovii	Nakai	*
Angiospermae	Brassicaceae	Cardamine	Cardamine leucantha	(Tausch) O.E.Schulz
Angiospermae	Brassicaceae	Cardamine	Cardamine lyrata	Bunge
Angiospermae	Brassicaceae	Cardamine	Cardamine parviflora	L.	*
Angiospermae	Brassicaceae	Cardamine	Cardamine pratensis	L.	*
Angiospermae	Brassicaceae	Cardamine	Cardamine prorepens	Fisch. ex DC.
Angiospermae	Brassicaceae	Cardamine	Cardamine trifida	(Lam. ex Poir.) B.M.G.Jones
Angiospermae	Brassicaceae	Rorippa	Rorippa barbareifolia	(DC.) Kitag.
Angiospermae	Brassicaceae	Rorippa	Rorippa islandica	(Oeder) Borbás
Angiospermae	Brassicaceae	Descurainia	Descurainia sophia	(L.) Webb ex Prantl
Angiospermae	Brassicaceae	Dontostemon	Dontostemon dentatus	(Bunge) C.A.Mey. ex Ledeb.
Angiospermae	Brassicaceae	Dontostemon	Dontostemon hispidus	Maxim.	*
Angiospermae	Brassicaceae	Dontostemon	Dontostemon micranthus	C.A.Mey.	*
Angiospermae	Brassicaceae	Erysimum	Erysimum altaicum	C.A.Mey.
Angiospermae	Brassicaceae	Erysimum	Erysimum cheiranthoides	L.
Angiospermae	Brassicaceae	Erysimum	Erysimum perofskianum	Fisch. & C.A.Mey.	*
Angiospermae	Brassicaceae	Erysimum	Erysimum flavum	(Georgi) Bobrov	*
Angiospermae	Brassicaceae	Lepidium	Lepidium apetalum	Willd.	*
Angiospermae	Brassicaceae	Lepidium	Lepidium densiflorum	Schrad.	*
Angiospermae	Brassicaceae	Lepidium	Lepidium latifolium	L.
Angiospermae	Brassicaceae	Sisymbrium	Sisymbrium officinale	(L.) Scop.
Angiospermae	Brassicaceae	Stevenia	Stevenia cheiranthoides	DC.	*new gene
Angiospermae	Brassicaceae	Thlaspi	Thlaspi arvense	L.
Angiospermae	Santalaceae	Thesium	Thesium chinense	Turcz.
Angiospermae	Santalaceae	Thesium	Thesium longifolium	Turcz.
Angiospermae	Santalaceae	Thesium	Thesium refractum	C.A.Mey.	*
Angiospermae	Santalaceae	Viscum	Viscum coloratum	(Kom.) Nakai
Angiospermae	Plumbaginaceae	Limonium	Limonium bicolor	(Bunge) Kuntze	*
Angiospermae	Polygonaceae	Persicaria	Persicaria amphibia	(L.) Delarbre
Angiospermae	Polygonaceae	Persicaria	Persicaria bungeana	(Turcz.) Nakai
Angiospermae	Polygonaceae	Persicaria	Persicaria hydropiper	(L.) Delarbre
Angiospermae	Polygonaceae	Persicaria	Persicaria lapathifolia	(L.) Delarbre
Angiospermae	Polygonaceae	Persicaria	Persicaria longiseta	(Bruijn) Kitag.
Angiospermae	Polygonaceae	Persicaria	Persicaria maculosa	Gray	*
Angiospermae	Polygonaceae	Persicaria	Persicaria minor	(Huds.) Opiz
Angiospermae	Polygonaceae	Persicaria	Persicaria orientalis	(L.) Spach
Angiospermae	Polygonaceae	Persicaria	Persicaria sagittata	(L.) H.Gross
Angiospermae	Polygonaceae	Persicaria	Persicaria strigosa	(R.Br.) Nakai
Angiospermae	Polygonaceae	Persicaria	Persicaria vivipara	(L.) Ronse Decr.	*
Angiospermae	Polygonaceae	Rumex	Rumex acetosa	L.
Angiospermae	Polygonaceae	Rumex	Rumex acetosella	L.
Angiospermae	Polygonaceae	Rumex	Rumex aquaticus	L.	*
Angiospermae	Polygonaceae	Rumex	Rumex crispus	L.	*
Angiospermae	Polygonaceae	Rumex	Rumex gmelinii	Turcz. ex Ledeb.
Angiospermae	Polygonaceae	Rumex	Rumex longifolius	DC.
Angiospermae	Polygonaceae	Rumex	Rumex maritimus	L.
Angiospermae	Polygonaceae	Rumex	Rumex marschallianus	Rchb.	*
Angiospermae	Polygonaceae	Rumex	Rumex patientia	L.	*
Angiospermae	Polygonaceae	Rumex	Rumex stenophyllus	Ledeb.	*
Angiospermae	Polygonaceae	Rumex	Rumex thyrsiflorus	Fingerh.
Angiospermae	Polygonaceae	Fallopia	Fallopia convolvulus	(L.) Á.Löve
Angiospermae	Polygonaceae	Fallopia	Fallopia dentatoalata	(F.Schmidt) Holub	*
Angiospermae	Polygonaceae	Fallopia	Fallopia dentatoalata	(F.Schmidt) Holub
Angiospermae	Polygonaceae	Fallopia	Fallopia dumetorum	(L.) Holub
Angiospermae	Polygonaceae	Atraphaxis	Atraphaxis frutescens	(L.) K.Koch	*new gene
Angiospermae	Polygonaceae	Atraphaxis	Atraphaxis manshurica	Kitag.	*new gene+
Angiospermae	Polygonaceae	Polygonum	Polygonum alopecuroides	Turcz. ex Meissn.
Angiospermae	Polygonaceae	Polygonum	Polygonum aviculare	L.
Angiospermae	Polygonaceae	Polygonum	Polygonum aviculare var. fusco-ochreatum	(Kom.) A.J.Li	*
Angiospermae	Polygonaceae	Polygonum	Polygonum boreale	(Lange) Small	*
Angiospermae	Polygonaceae	Polygonum	Polygonum divaricatum	L.
Angiospermae	Polygonaceae	Polygonum	Polygonum foliosum var. paludicola	(Makino) Kitam.	*
Angiospermae	Polygonaceae	Polygonum	Polygonum hastatosagittatum	Makino
Angiospermae	Polygonaceae	Polygonum	Polygonum humifusum	C. Merck ex K. Koch
Angiospermae	Polygonaceae	Polygonum	Polygonum kawagoeanum	Makino	*
Angiospermae	Polygonaceae	Polygonum	Polygonum lapathifolium var. lanatum	(Roxb.) Steward	*
Angiospermae	Polygonaceae	Polygonum	Polygonum longisetum	Bruijn
Angiospermae	Polygonaceae	Polygonum	Polygonum longisetum var. rotundatum	A.J. Li
Angiospermae	Polygonaceae	Polygonum	Polygonum maackianum	Regel	*
Angiospermae	Polygonaceae	Polygonum	Polygonum manshuriense	Petrov ex Kom.
Angiospermae	Polygonaceae	Polygonum	Polygonum muricatum	Meisn.	*
Angiospermae	Polygonaceae	Polygonum	Polygonum ochreatum	L.	*
Angiospermae	Polygonaceae	Polygonum	Polygonum pacificum	Petrov ex Kom.
Angiospermae	Polygonaceae	Polygonum	Polygonum patulum	M.Bieb.	*
Angiospermae	Polygonaceae	Polygonum	Polygonum perfoliatum	L.
Angiospermae	Polygonaceae	Polygonum	Polygonum posumbu	Buch.-Ham. ex D. Don	*
Angiospermae	Polygonaceae	Polygonum	Polygonum rigidum	Skvortsov	*
Angiospermae	Polygonaceae	Polygonum	Polygonum sibiricum	Laxm.	*
Angiospermae	Polygonaceae	Polygonum	Polygonum thunbergii	Siebold & Zucc.
Angiospermae	Polygonaceae	Polygonum	Polygonum trigonocarpum	(Makino) Kudô & Masam.	*
Angiospermae	Polygonaceae	Polygonum	Polygonum viscosum	Buch.-Ham. ex D. Don
Angiospermae	Caryophyllaceae	Minuartia	Minuartia laricina	(L.) Mattf.
Angiospermae	Caryophyllaceae	Minuartia	Minuartia macrocarpa var. koreana	(Nakai) Hara	*
Angiospermae	Caryophyllaceae	Moehringia	Moehringia lateriflora	(L.) Fenzl
Angiospermae	Caryophyllaceae	Pseudostellaria	Pseudostellaria davidii	(Franch.) Pax
Angiospermae	Caryophyllaceae	Pseudostellaria	Pseudostellaria japonica	(Korsh.) Pax
Angiospermae	Caryophyllaceae	Pseudostellaria	Pseudostellaria rupestris	(Turcz.) Pax	*
Angiospermae	Caryophyllaceae	Pseudostellaria	Pseudostellaria sylvatica	(Maxim.) Pax
Angiospermae	Caryophyllaceae	Stellaria	Stellaria bungeana	Fenzl	*new gene
Angiospermae	Caryophyllaceae	Stellaria	Stellaria cherleriae	(Fisch. ex Ser.) F.N. Williams	*new gene+
Angiospermae	Caryophyllaceae	Stellaria	Stellaria discolor	Turcz.
Angiospermae	Caryophyllaceae	Stellaria	Stellaria filicaulis	Makino
Angiospermae	Caryophyllaceae	Stellaria	Stellaria graminea	L.	*
Angiospermae	Caryophyllaceae	Stellaria	Stellaria longifolia	Muhl. ex Willd.
Angiospermae	Caryophyllaceae	Stellaria	Stellaria media	(L.) Vill.
Angiospermae	Caryophyllaceae	Stellaria	Stellaria radians	L.
Angiospermae	Caryophyllaceae	Cerastium	Cerastium arvense	L.	*
Angiospermae	Caryophyllaceae	Cerastium	Cerastium fontanum subsp. vulgare	(Hartm.) Greuter & Burdet
Angiospermae	Caryophyllaceae	Cerastium	Cerastium pauciflorum var. amurense	(Regel) M.Mizush.
Angiospermae	Caryophyllaceae	Eremogone	Eremogone capillaris	(Poir.) Fenzl	*
Angiospermae	Caryophyllaceae	Eremogone	Eremogone juncea	(M.Bieb.) Fenzl
Angiospermae	Caryophyllaceae	Agrostemma	Agrostemma githago	L.
Angiospermae	Caryophyllaceae	Lychnis	Lychnis cognata	Maxim.
Angiospermae	Caryophyllaceae	Lychnis	Lychnis fulgens	Fisch.
Angiospermae	Caryophyllaceae	Lychnis	Lychnis wilfordii	(Regel) Maxim.	*
Angiospermae	Caryophyllaceae	Silene	Silene aprica	Turcz.
Angiospermae	Caryophyllaceae	Silene	Silene baccifera	(L.) Roth	*
Angiospermae	Caryophyllaceae	Silene	Silene firma	Siebold & Zucc.
Angiospermae	Caryophyllaceae	Silene	Silene foliosa	Maxim.	*
Angiospermae	Caryophyllaceae	Silene	Silene jeniseensis	Willd.	*
Angiospermae	Caryophyllaceae	Silene	Silene jenisseensis	Willd.
Angiospermae	Caryophyllaceae	Silene	Silene macrostyla	Maxim.
Angiospermae	Caryophyllaceae	Silene	Silene nocturna var. brachypetala	(Robill. & Castagne ex DC.) Benth.	*
Angiospermae	Caryophyllaceae	Silene	Silene repens	Patrin
Angiospermae	Caryophyllaceae	Silene	Silene vulgaris	(Moench) Garcke
Angiospermae	Caryophyllaceae	Gypsophila	Gypsophila davurica	Turcz. ex Fenzl
Angiospermae	Caryophyllaceae	Gypsophila	Gypsophila oldhamiana	Miq.	*
Angiospermae	Caryophyllaceae	Gypsophila	Gypsophila pacifica	Kom.
Angiospermae	Caryophyllaceae	Dianthus	Dianthus chinensis	L.
Angiospermae	Caryophyllaceae	Dianthus	Dianthus repens	Willd.	*
Angiospermae	Caryophyllaceae	Dianthus	Dianthus superbus	L.	*
Angiospermae	Amaranthaceae	Corispermum	Corispermum elongatum	Bunge ex Maxim.	*new gene
Angiospermae	Amaranthaceae	Corispermum	Corispermum macrocarpum	Bunge ex Maxim.	*new gene+
Angiospermae	Amaranthaceae	Axyris	Axyris amaranthoides	L.
Angiospermae	Amaranthaceae	Dysphania	Dysphania aristata	(L.) Mosyakin & Clemants
Angiospermae	Amaranthaceae	Dysphania	Dysphania botrys	(L.) Mosyakin & Clemants	*
Angiospermae	Amaranthaceae	Dysphania	Dysphania schraderiana	(Schult.) Mosyakin & Clemants
Angiospermae	Amaranthaceae	Chenopodium	Chenopodium acuminatum	Willd.
Angiospermae	Amaranthaceae	Chenopodium	Chenopodium album	L.
Angiospermae	Amaranthaceae	Chenopodium	Chenopodium bryoniifolium	Bunge
Angiospermae	Amaranthaceae	Chenopodium	Chenopodium glaucum	L.
Angiospermae	Amaranthaceae	Chenopodium	Chenopodium hybridum	L.
Angiospermae	Amaranthaceae	Chenopodium	Chenopodium stenophyllum	(Makino) Koidz.
Angiospermae	Amaranthaceae	Bassia	Bassia scoparia	(L.) A.J.Scott
Angiospermae	Amaranthaceae	Salsola	Salsola collina	Pall.
Angiospermae	Amaranthaceae	Amaranthus	Amaranthus albus	L.	*
Angiospermae	Amaranthaceae	Amaranthus	Amaranthus blitum	L.
Angiospermae	Amaranthaceae	Amaranthus	Amaranthus retroflexus	L.	*
Angiospermae	Hydrangeaceae	Deutzia	Deutzia baroniana	Diels	*
Angiospermae	Hydrangeaceae	Deutzia	Deutzia glabrata	Kom.
Angiospermae	Hydrangeaceae	Deutzia	Deutzia parviflora	Bunge	*
Angiospermae	Hydrangeaceae	Deutzia	Deutzia parviflora var. amurensis	Regel
Angiospermae	Hydrangeaceae	Philadelphus	Philadelphus schrenkii	Rupr.
Angiospermae	Hydrangeaceae	Philadelphus	Philadelphus tenuifolius	Rupr.
Angiospermae	Cornaceae	Alangium	Alangium platanifolium	(Siebold & Zucc.) Harms	*new gene
Angiospermae	Cornaceae	Cornus	Cornus alba	L.
Angiospermae	Balsaminaceae	Impatiens	Impatiens furcillata	Hemsl.	*
Angiospermae	Balsaminaceae	Impatiens	Impatiens noli-tangere	L.
Angiospermae	Polemoniaceae	Polemonium	Polemonium acutiflorum	Willd. ex Roem. & Schult.
Angiospermae	Polemoniaceae	Polemonium	Polemonium caeruleum	L.	*
Angiospermae	Polemoniaceae	Polemonium	Polemonium chinense	(Brand) Brand
Angiospermae	Primulaceae	Androsace	Androsace filiformis	Retz.
Angiospermae	Primulaceae	Androsace	Androsace septentrionalis	L.	*
Angiospermae	Primulaceae	Androsace	Androsace umbellata	(Lour.) Merr.
Angiospermae	Primulaceae	Primula	Primula farinosa	L.	*
Angiospermae	Primulaceae	Primula	Primula farinosa var. denudata	W.D.J. Koch
Angiospermae	Primulaceae	Primula	Primula fistulosa	Turkev.
Angiospermae	Primulaceae	Primula	Primula matthioli	(L.) K.Richt.	*
Angiospermae	Primulaceae	Primula	Primula patens	E.A. Busch	*
Angiospermae	Primulaceae	Primula	Primula pumilio	Maxim.	*
Angiospermae	Primulaceae	Primula	Primula saxatilis	Kom.	*
Angiospermae	Primulaceae	Primula	Primula sieboldii	E.Morren
Angiospermae	Primulaceae	Lysimachia	Lysimachia barystachys	Bunge
Angiospermae	Primulaceae	Lysimachia	Lysimachia clethroides	Duby	*
Angiospermae	Primulaceae	Lysimachia	Lysimachia davurica	Ledeb.
Angiospermae	Primulaceae	Lysimachia	Lysimachia europaea	(L.) U.Manns & Anderb.
Angiospermae	Primulaceae	Lysimachia	Lysimachia thyrsiflora	L.
Angiospermae	Actinidiaceae	Actinidia	Actinidia kolomikta	(Rupr. & Maxim.) Maxim.
Angiospermae	Ericaceae	Orthilia	Orthilia secunda	(L.) House
Angiospermae	Ericaceae	Orthilia	Orthilia secunda subsp. obtusata	(Turcz.) Böcher
Angiospermae	Ericaceae	Pyrola	Pyrola asarifolia subsp. incarnata	(DC.) Haber & Hir. Takah.
Angiospermae	Ericaceae	Pyrola	Pyrola dahurica	(Andres) Kom.
Angiospermae	Ericaceae	Pyrola	Pyrola japonica	Klenze ex Alef.	*
Angiospermae	Ericaceae	Pyrola	Pyrola renifolia	Maxim.	*
Angiospermae	Ericaceae	Pyrola	Pyrola rotundifolia	L.	*
Angiospermae	Ericaceae	Pyrola	Pyrola tschanbaischanica	Y.L. Chou & Y.L. Chang	*
Angiospermae	Ericaceae	Moneses	Moneses uniflora	A.Gray
Angiospermae	Ericaceae	Arctous	Arctous alpina	(L.) Nied.	*new gene
Angiospermae	Ericaceae	Arctous	Arctous rubra	(Rehder & E.H.Wilson) Nakai	*new gene+
Angiospermae	Ericaceae	Monotropastrum	Monotropastrum humile	(D.Don) H.Hara	*new gene
Angiospermae	Ericaceae	Monotropa	Monotropa hypopitys	L.
Angiospermae	Ericaceae	Rhododendron	Rhododendron dauricum	L.
Angiospermae	Ericaceae	Rhododendron	Rhododendron micranthum	Turcz.	*
Angiospermae	Ericaceae	Rhododendron	Rhododendron mucronulatum	Turcz.	*
Angiospermae	Ericaceae	Ledum	Ledum palustre	L.
Angiospermae	Ericaceae	Chamaedaphne	Chamaedaphne calyculata	(L.) Moench
Angiospermae	Ericaceae	Vaccinium	Vaccinium uliginosum	L.
Angiospermae	Ericaceae	Vaccinium	Vaccinium vitis-idaea	L.
Angiospermae	Rubiaceae	Rubia	Rubia chinensis	Regel & Maack
Angiospermae	Rubiaceae	Rubia	Rubia cordifolia	L.
Angiospermae	Rubiaceae	Rubia	Rubia sylvatica	(Maxim.) Nakai
Angiospermae	Rubiaceae	Galium	Galium boreale	L.
Angiospermae	Rubiaceae	Galium	Galium dahuricum	Turcz. ex Ledeb.
Angiospermae	Rubiaceae	Galium	Galium dahuricum var. lasiocarpum	(Makino) Nakai
Angiospermae	Rubiaceae	Galium	Galium maximowiczii	(Kom.) Pobed.
Angiospermae	Rubiaceae	Galium	Galium paradoxum	Maxim.
Angiospermae	Rubiaceae	Galium	Galium platygalium	(Maxim.) Pobed.	*
Angiospermae	Rubiaceae	Galium	Galium rubioides	L.	*
Angiospermae	Rubiaceae	Galium	Galium spurium	L.	*
Angiospermae	Rubiaceae	Galium	Galium trifidum	L.
Angiospermae	Rubiaceae	Galium	Galium trifloriforme	Kom.	*
Angiospermae	Rubiaceae	Galium	Galium verum	L.
Angiospermae	Gentianaceae	Gentiana	Gentiana caeruleogrisea	T.N.Ho	*
Angiospermae	Gentianaceae	Gentiana	Gentiana macrophylla	Pall.
Angiospermae	Gentianaceae	Gentiana	Gentiana manshurica	Kitag.
Angiospermae	Gentianaceae	Gentiana	Gentiana scabra	Bunge
Angiospermae	Gentianaceae	Gentiana	Gentiana scabra var. buergeri	(Miq.) Maxim. ex Franch. & Sav.	*
Angiospermae	Gentianaceae	Gentiana	Gentiana triflora	Pall.
Angiospermae	Gentianaceae	Gentiana	Gentiana uchiyamae	Nakai
Angiospermae	Gentianaceae	Gentiana	Gentiana zollingeri	Fawc.	*
Angiospermae	Gentianaceae	Swertia	Swertia diluta	(Turcz.) Benth. & Hook. f.
Angiospermae	Gentianaceae	Swertia	Swertia perennis	L.	*
Angiospermae	Gentianaceae	Swertia	Swertia pseudochinensis	H.Hara
Angiospermae	Gentianaceae	Pterygocalyx	Pterygocalyx volubilis	Maxim.
Angiospermae	Gentianaceae	Gentianopsis	Gentianopsis barbata	(Froel.) Ma
Angiospermae	Gentianaceae	Halenia	Halenia corniculata	(L.) Cornaz
Angiospermae	Apocynaceae	Periploca	Periploca sepium	Bunge	*new gene
Angiospermae	Apocynaceae	Cynanchum	Cynanchum acutum subsp. sibiricum	(Willd.) Rech.f.	*
Angiospermae	Apocynaceae	Cynanchum	Cynanchum atratum	Bunge
Angiospermae	Apocynaceae	Cynanchum	Cynanchum paniculatum	(Bunge) Kitag. ex H.Hara
Angiospermae	Apocynaceae	Cynanchum	Cynanchum volubile	(Maxim.) Hemsl.
Angiospermae	Apocynaceae	Metaplexis	Metaplexis japonica	(Thunb.) Makino
Angiospermae	Boraginaceae	Lithospermum	Lithospermum erythrorhizon	Siebold & Zucc.
Angiospermae	Boraginaceae	Lappula	Lappula squarrosa	(Retz.) Dumort.
Angiospermae	Boraginaceae	Eritrichium	Eritrichium borealisinense	Kitag.	*new gene
Angiospermae	Boraginaceae	Amblynotus	Amblynotus rupestris	(Pall.) Popov	*new gene
Angiospermae	Boraginaceae	Trigonotis	Trigonotis myosotidea	(Maxim.) Maxim.
Angiospermae	Boraginaceae	Trigonotis	Trigonotis peduncularis	(Trevir.) Steven ex Palib.
Angiospermae	Boraginaceae	Trigonotis	Trigonotis peduncularis var. amblyosepala	(Nakai & Kitag.) W.T. Wang	*
Angiospermae	Boraginaceae	Trigonotis	Trigonotis radicans	Steven
Angiospermae	Boraginaceae	Trigonotis	Trigonotis radicans subsp. sericea	(Maxim.) Riedl
Angiospermae	Boraginaceae	Myosotis	Myosotis laxa subsp. caespitosa	(Schultz) Hyl. ex Nordh.	*
Angiospermae	Boraginaceae	Myosotis	Myosotis suaveolens	Waldst. & Kit. ex Willd.
Angiospermae	Boraginaceae	Brachybotrys	Brachybotrys paridiformis	Maxim. ex Oliv.
Angiospermae	Convolvulaceae	Cuscuta	Cuscuta chinensis	Lam.	*
Angiospermae	Convolvulaceae	Cuscuta	Cuscuta japonica	Choisy
Angiospermae	Convolvulaceae	Calystegia	Calystegia hederacea	Wall.
Angiospermae	Convolvulaceae	Calystegia	Calystegia pellita	(Ledeb.) G. Don
Angiospermae	Convolvulaceae	Calystegia	Calystegia pubescens	Lindl.
Angiospermae	Convolvulaceae	Calystegia	Calystegia sepium	(L.) R. Br.
Angiospermae	Convolvulaceae	Calystegia	Calystegia sepium subsp. spectabilis	Brummitt	*
Angiospermae	Solanaceae	Solanum	Solanum americanum	Mill.
Angiospermae	Solanaceae	Physalis	Physalis pubescens	L.	*new gene
Angiospermae	Oleaceae	Syringa	Syringa pubescens subsp. patula	(Palib.) M.C.Chang & X.L.Chen	*
Angiospermae	Oleaceae	Syringa	Syringa reticulata subsp. amurensis	(Rupr.) P.S.Green & M.C.Chang
Angiospermae	Oleaceae	Fraxinus	Fraxinus bungeana	A.DC.	*
Angiospermae	Oleaceae	Fraxinus	Fraxinus chinensis	Roxb.	*
Angiospermae	Oleaceae	Fraxinus	Fraxinus chinensis subsp. rhynchophylla	(Hance) A.E.Murray	*
Angiospermae	Oleaceae	Fraxinus	Fraxinus mandshurica	Rupr.
Angiospermae	Plantaginaceae	Trapella	Trapella sinensis	Oliv.	*new family
Angiospermae	Plantaginaceae	Linaria	Linaria vulgaris	Mill.	*
Angiospermae	Plantaginaceae	Linaria	Linaria vulgaris subsp. sinensis	(Debeaux) D.Y. Hong
Angiospermae	Plantaginaceae	Hippuris	Hippuris vulgaris	L.
Angiospermae	Plantaginaceae	Callitriche	Callitriche hermaphroditica	L.	*
Angiospermae	Plantaginaceae	Callitriche	Callitriche palustris	L.
Angiospermae	Plantaginaceae	Callitriche	Callitriche palustris var. elegans	(Petrov) Y.L.Chang
Angiospermae	Plantaginaceae	Veronicastrum	Veronicastrum sibiricum	(L.) Pennell
Angiospermae	Plantaginaceae	Veronicastrum	Veronicastrum tubiflorum	(Fisch. & C.A. Mey.) H. Hara
Angiospermae	Plantaginaceae	Veronica	Veronica daurica	Steven	*
Angiospermae	Plantaginaceae	Veronica	Veronica linariifolia	Pall. ex Link
Angiospermae	Plantaginaceae	Veronica	Veronica longifolia	L.
Angiospermae	Plantaginaceae	Veronica	Veronica rotunda	Nakai	*
Angiospermae	Plantaginaceae	Veronica	Veronica spicata subsp. incana	(L.) Walters	*
Angiospermae	Plantaginaceae	Veronica	Veronica stelleri	Pall. ex Link	*
Angiospermae	Plantaginaceae	Pseudolysimachion	Pseudolysimachion linariifolium subsp. dilatatum	(Nakai & Kitag.) D.Y. Hong	*
Angiospermae	Plantaginaceae	Pseudolysimachion	Pseudolysimachion rotundum subsp. subintegrum	(Nakai) D.Y. Hong
Angiospermae	Plantaginaceae	Plantago	Plantago asiatica	L.
Angiospermae	Plantaginaceae	Plantago	Plantago depressa	Willd.
Angiospermae	Plantaginaceae	Plantago	Plantago depressa subsp. turczaninowii	(Ganesch.) Tzvelev	*
Angiospermae	Plantaginaceae	Plantago	Plantago major	L.
Angiospermae	Scrophulariaceae	Limosella	Limosella aquatica	L.
Angiospermae	Linderniaceae	Lindernia	Lindernia procumbens	(Krock.) Philcox	*new family
Angiospermae	Lentibulariaceae	Utricularia	Utricularia intermedia	Hayne
Angiospermae	Lentibulariaceae	Utricularia	Utricularia vulgaris	L.
Angiospermae	Lamiaceae	Ajuga	Ajuga multiflora	Bunge
Angiospermae	Lamiaceae	Amethystea	Amethystea caerulea	L.
Angiospermae	Lamiaceae	Prunella	Prunella vulgaris subsp. asiatica	(Nakai) H.Hara
Angiospermae	Lamiaceae	Lycopus	Lycopus lucidus	Turcz. ex Benth.
Angiospermae	Lamiaceae	Lycopus	Lycopus lucidus var. hirtus	Regel	*
Angiospermae	Lamiaceae	Lycopus	Lycopus lucidus var. maackianus	Maxim. ex Herder
Angiospermae	Lamiaceae	Nepeta	Nepeta tenuifolia	Benth.
Angiospermae	Lamiaceae	Dracocephalum	Dracocephalum argunense	Fisch. ex Link
Angiospermae	Lamiaceae	Dracocephalum	Dracocephalum moldavica	L.	*
Angiospermae	Lamiaceae	Dracocephalum	Dracocephalum ruyschiana	L.	*
Angiospermae	Lamiaceae	Agastache	Agastache rugosa	(Fisch. & C.A.Mey.) Kuntze
Angiospermae	Lamiaceae	Glechoma	Glechoma longituba	(Nakai) Kuprian.
Angiospermae	Lamiaceae	Thymus	Thymus dahuricus	Serg.
Angiospermae	Lamiaceae	Mentha	Mentha canadensis	L.
Angiospermae	Lamiaceae	Mentha	Mentha dahurica	Fisch. ex Benth.
Angiospermae	Lamiaceae	Clinopodium	Clinopodium chinense	(Benth.) Kuntze	*
Angiospermae	Lamiaceae	Clinopodium	Clinopodium chinense subsp. grandiflorum	(Maxim.) H.Hara
Angiospermae	Lamiaceae	Elsholtzia	Elsholtzia ciliata	(Thunb.) Hyl.
Angiospermae	Lamiaceae	Elsholtzia	Elsholtzia densa	Benth.	*
Angiospermae	Lamiaceae	Elsholtzia	Elsholtzia splendens	Nakai ex F.Maek.	*
Angiospermae	Lamiaceae	Isodon	Isodon excisus	(Maxim.) Kudô
Angiospermae	Lamiaceae	Isodon	Isodon inflexus	(Thunb.) Kudô	*
Angiospermae	Lamiaceae	Isodon	Isodon japonicus var. glaucocalyx	(Maxim.) H.W.Li
Angiospermae	Lamiaceae	Scutellaria	Scutellaria baicalensis	Georgi
Angiospermae	Lamiaceae	Scutellaria	Scutellaria dependens	Maxim.
Angiospermae	Lamiaceae	Scutellaria	Scutellaria moniliorhiza	Kom.	*
Angiospermae	Lamiaceae	Scutellaria	Scutellaria pekinensis	Maxim.	*
Angiospermae	Lamiaceae	Scutellaria	Scutellaria pekinensis var. ussuriensis	(Regel) Hand.-Mazz.
Angiospermae	Lamiaceae	Scutellaria	Scutellaria regeliana	Nakai
Angiospermae	Lamiaceae	Scutellaria	Scutellaria regeliana var. ikonnikovii	(Juz.) C.Y.Wu & H.W.Li	*
Angiospermae	Lamiaceae	Scutellaria	Scutellaria scordiifolia	Fisch. ex Schrank
Angiospermae	Lamiaceae	Scutellaria	Scutellaria strigillosa	Hemsl.	*
Angiospermae	Lamiaceae	Scutellaria	Scutellaria tuminensis	Nakai
Angiospermae	Lamiaceae	Galeopsis	Galeopsis bifida	Boenn.
Angiospermae	Lamiaceae	Stachys	Stachys chinensis	Bunge ex Benth.
Angiospermae	Lamiaceae	Stachys	Stachys riederi	Cham.
Angiospermae	Lamiaceae	Stachys	Stachys riederi var. hispidula	(Regel) H.Hara	*
Angiospermae	Lamiaceae	Stachys	Stachys riederi var. japonica	(Miq.) H.Hara	*
Angiospermae	Lamiaceae	Phlomoides	Phlomoides maximowiczii	(Regel) Kamelin & Makhm.	*new gene
Angiospermae	Lamiaceae	Phlomoides	Phlomoides umbrosa	(Turcz.) Kamelin & Makhm.	*new gene+
Angiospermae	Lamiaceae	Leonurus	Leonurus japonicus	Houtt.
Angiospermae	Lamiaceae	Leonurus	Leonurus macranthus	Maxim.	*
Angiospermae	Lamiaceae	Leonurus	Leonurus sibiricus	L.	*
Angiospermae	Lamiaceae	Leonurus	Leonurus sibiricus	L.	*
Angiospermae	Lamiaceae	Leonurus	Leonurus tataricus	L.
Angiospermae	Lamiaceae	Lagopsis	Lagopsis supina	(Steph. ex Willd.) Ikonn.-Gal.
Angiospermae	Lamiaceae	Lamium	Lamium album	L.
Angiospermae	Lamiaceae	Lamium	Lamium album subsp. barbatum	(Siebold & Zucc.) Mennema	*
Angiospermae	Mazaceae	Mazus	Mazus stachydifolius	(Turcz.) Maxim.
Angiospermae	Phrymaceae	Phryma	Phryma leptostachya	L.
Angiospermae	Phrymaceae	Phryma	Phryma leptostachya var. oblongifolia	(Koidz.) Honda	*
Angiospermae	Orobanchaceae	Siphonostegia	Siphonostegia chinensis	Benth.
Angiospermae	Orobanchaceae	Orobanche	Orobanche coerulescens	Stephan ex Willd.
Angiospermae	Orobanchaceae	Orobanche	Orobanche pycnostachya	Hance
Angiospermae	Orobanchaceae	Orobanche	Orobanche pycnostachya var. amurensis	Beck
Angiospermae	Orobanchaceae	Melampyrum	Melampyrum roseum	Maxim.
Angiospermae	Orobanchaceae	Euphrasia	Euphrasia amurensis	Freyn	*
Angiospermae	Orobanchaceae	Euphrasia	Euphrasia maximowiczii	Wettst. ex Pubalin
Angiospermae	Orobanchaceae	Euphrasia	Euphrasia pectinata subsp. simplex	(Freyn) Hong	*
Angiospermae	Orobanchaceae	Euphrasia	Euphrasia tatarica	Fisch. ex Spreng.
Angiospermae	Orobanchaceae	Omphalotrix	Omphalotrix longipes	Maxim.
Angiospermae	Orobanchaceae	Odontites	Odontites vulgaris	Moench
Angiospermae	Orobanchaceae	Pedicularis	Pedicularis grandiflora	Fisch.
Angiospermae	Orobanchaceae	Pedicularis	Pedicularis resupinata	L.
Angiospermae	Orobanchaceae	Pedicularis	Pedicularis rubens	Stephan ex Willd.
Angiospermae	Orobanchaceae	Pedicularis	Pedicularis sceptrum-carolinum	L.
Angiospermae	Orobanchaceae	Pedicularis	Pedicularis sceptrum-carolinum subsp. pubescens	(Bunge) Tsoong	*
Angiospermae	Orobanchaceae	Pedicularis	Pedicularis spicata	Pall.
Angiospermae	Orobanchaceae	Pedicularis	Pedicularis striata	Pall.
Angiospermae	Orobanchaceae	Pedicularis	Pedicularis venusta	Schangin ex Bunge
Angiospermae	Orobanchaceae	Pedicularis	Pedicularis verticillata	L.	*
Angiospermae	Orobanchaceae	Phtheirospermum	Phtheirospermum japonicum	(Thunb.) Kanitz
Angiospermae	Orobanchaceae	Castilleja	Castilleja pallida	(L.) Kunth
Angiospermae	Campanulaceae	Platycodon	Platycodon grandiflorus	(Jacq.) A.DC.
Angiospermae	Campanulaceae	Codonopsis	Codonopsis lanceolata	(Siebold & Zucc.) Benth. & Hook.f. ex Trautv.
Angiospermae	Campanulaceae	Codonopsis	Codonopsis pilosula	(Franch.) Nannf.
Angiospermae	Campanulaceae	Codonopsis	Codonopsis ussuriensis	(Rupr. & Maxim.) Hemsl.
Angiospermae	Campanulaceae	Campanula	Campanula glomerata	L.
Angiospermae	Campanulaceae	Campanula	Campanula glomerata subsp. speciosa	(Hornem. ex Spreng.) Domin	*
Angiospermae	Campanulaceae	Campanula	Campanula punctata	Lam.
Angiospermae	Campanulaceae	Adenophora	Adenophora capillaris subsp. paniculata	(Nannf.) D.Y.Hong & S.Ge	*
Angiospermae	Campanulaceae	Adenophora	Adenophora divaricata	Franch. & Sav.
Angiospermae	Campanulaceae	Adenophora	Adenophora gmelinii	(Biehler) Fisch.
Angiospermae	Campanulaceae	Adenophora	Adenophora grandiflora	Nakai	*
Angiospermae	Campanulaceae	Adenophora	Adenophora palustris	Kom.	*
Angiospermae	Campanulaceae	Adenophora	Adenophora pereskiifolia	(Fisch. ex Schult.) G.Don
Angiospermae	Campanulaceae	Adenophora	Adenophora polyantha	Nakai	*
Angiospermae	Campanulaceae	Adenophora	Adenophora stenanthina	(Ledeb.) Kitag.	*
Angiospermae	Campanulaceae	Adenophora	Adenophora stenophylla	Hemsl.	*
Angiospermae	Campanulaceae	Adenophora	Adenophora tricuspidata	(Fisch. ex Schult.) A.DC.
Angiospermae	Campanulaceae	Adenophora	Adenophora triphylla	(Thunb.) A.DC.
Angiospermae	Campanulaceae	Lobelia	Lobelia sessilifolia	Lamb.
Angiospermae	Menyanthaceae	Menyanthes	Menyanthes trifoliata	L.
Angiospermae	Menyanthaceae	Nymphoides	Nymphoides peltata	(S.G.Gmel.) Kuntze
Angiospermae	Asteraceae	Adenocaulon	Adenocaulon himalaicum	Edgew.
Angiospermae	Asteraceae	Leibnitzia	Leibnitzia anandria	(L.) Turcz.
Angiospermae	Asteraceae	Atractylodes	Atractylodes japonica	Koidz. ex Kitam.
Angiospermae	Asteraceae	Atractylodes	Atractylodes koreana	(Nakai) Kitam.	*
Angiospermae	Asteraceae	Atractylodes	Atractylodes lancea	(Thunb.) DC.	*
Angiospermae	Asteraceae	Atractylodes	Atractylodes ovata	(Thunb.) DC.	*
Angiospermae	Asteraceae	Synurus	Synurus deltoides	(Aiton) Nakai
Angiospermae	Asteraceae	Hemistepta	Hemistepta lyrata	(Bunge) Bunge
Angiospermae	Asteraceae	Saussurea	Saussurea amurensis	Turcz.
Angiospermae	Asteraceae	Saussurea	Saussurea chinnampoensis	H.Lév. & Vaniot	*
Angiospermae	Asteraceae	Saussurea	Saussurea elongata	DC.	*
Angiospermae	Asteraceae	Saussurea	Saussurea grandifolia	Maxim.
Angiospermae	Asteraceae	Saussurea	Saussurea japonica var. pteroclada	(Nakai & Kitag.) Raab-Straube
Angiospermae	Asteraceae	Saussurea	Saussurea manshurica	Kom.
Angiospermae	Asteraceae	Saussurea	Saussurea maximowiczii	Herder	*
Angiospermae	Asteraceae	Saussurea	Saussurea neoserrata	Nakai
Angiospermae	Asteraceae	Saussurea	Saussurea odontolepis	(Herder) Sch.Bip. ex Herder
Angiospermae	Asteraceae	Saussurea	Saussurea parviflora	(Poir.) DC.
Angiospermae	Asteraceae	Saussurea	Saussurea pulchella	(Fisch.) Fisch.
Angiospermae	Asteraceae	Saussurea	Saussurea recurvata	(Maxim.) Lipsch.
Angiospermae	Asteraceae	Saussurea	Saussurea sclerolepis	Nakai & Kitag.	*
Angiospermae	Asteraceae	Saussurea	Saussurea sinuata	Kom.
Angiospermae	Asteraceae	Saussurea	Saussurea stoliczkae	C.B.Clarke	*
Angiospermae	Asteraceae	Saussurea	Saussurea subtriangulata	Kom.
Angiospermae	Asteraceae	Saussurea	Saussurea tenerifolia	Kitag.	*
Angiospermae	Asteraceae	Saussurea	Saussurea tomentosa	Kom.	*
Angiospermae	Asteraceae	Saussurea	Saussurea triangulata	Trautv. & C.A.Mey.
Angiospermae	Asteraceae	Saussurea	Saussurea umbrosa	Kom.
Angiospermae	Asteraceae	Saussurea	Saussurea ussuriensis	Maxim.	*
Angiospermae	Asteraceae	Arctium	Arctium lappa	L.
Angiospermae	Asteraceae	Cirsium	Cirsium arvense	(L.) Scop.
Angiospermae	Asteraceae	Cirsium	Cirsium japonicum var. maackii	(Maxim.) Matsum.
Angiospermae	Asteraceae	Cirsium	Cirsium pendulum	Fisch. ex DC.
Angiospermae	Asteraceae	Cirsium	Cirsium schantarense	Trautv. & C.A.Mey.
Angiospermae	Asteraceae	Cirsium	Cirsium vlassovianum	Fisch. ex DC.
Angiospermae	Asteraceae	Cirsium	Cirsium shansiense	Petr.	*
Angiospermae	Asteraceae	Breea	Breea segeta	(Bunge) Kitam.
Angiospermae	Asteraceae	Carduus	Carduus crispus	Guirão ex Nyman
Angiospermae	Asteraceae	Serratula	Serratula centauroides	L.
Angiospermae	Asteraceae	Serratula	Serratula coronata	L.
Angiospermae	Asteraceae	Serratula	Serratula cupuliformis	Nakai & Kitag.	*
Angiospermae	Asteraceae	Serratula	Serratula marginata	Tausch	*
Angiospermae	Asteraceae	Serratula	Serratula polycephala	Iljin	*
Angiospermae	Asteraceae	Rhaponticum	Rhaponticum uniflorum	(L.) DC.
Angiospermae	Asteraceae	Ainsliaea	Ainsliaea acerifolia	Sch.Bip.	*
Angiospermae	Asteraceae	Scorzonera	Scorzonera albicaulis	Bunge
Angiospermae	Asteraceae	Scorzonera	Scorzonera austriaca	Willd.	*
Angiospermae	Asteraceae	Scorzonera	Scorzonera radiata	Fisch. ex Fisch.
Angiospermae	Asteraceae	Hieracium	Hieracium umbellatum	L.
Angiospermae	Asteraceae	Hieracium	Hieracium hololeion	Maxim.	*
Angiospermae	Asteraceae	Lactuca	Lactuca indica	L.
Angiospermae	Asteraceae	Lactuca	Lactuca raddeana	Maxim.
Angiospermae	Asteraceae	Lactuca	Lactuca sibirica	(L.) Benth. ex Maxim.
Angiospermae	Asteraceae	Lactuca	Lactuca triangulata	Maxim.
Angiospermae	Asteraceae	Sonchus	Sonchus asper	(L.) Hill
Angiospermae	Asteraceae	Sonchus	Sonchus brachyotus	DC.
Angiospermae	Asteraceae	Sonchus	Sonchus oleraceus	(L.) L.
Angiospermae	Asteraceae	Sonchus	Sonchus transcaspicus	Nevski	*
Angiospermae	Asteraceae	Hypochaeris	Hypochaeris ciliata	(Thunb.) Makino
Angiospermae	Asteraceae	Picris	Picris davurica	Fisch. ex Hornem.
Angiospermae	Asteraceae	Picris	Picris hieracioides subsp. japonica	(Thunb.) Krylov	*
Angiospermae	Asteraceae	Nabalus	Nabalus tatarinowii	(Maxim.) Nakai	*new gene
Angiospermae	Asteraceae	Taraxacum	Taraxacum asiaticum	Dahlst.	*
Angiospermae	Asteraceae	Taraxacum	Taraxacum brassicifolium	Kitag.
Angiospermae	Asteraceae	Taraxacum	Taraxacum lamprolepis	Kitag.
Angiospermae	Asteraceae	Taraxacum	Taraxacum mongolicum	Hand.-Mazz.	*
Angiospermae	Asteraceae	Taraxacum	Taraxacum platypecidum	Diels	*
Angiospermae	Asteraceae	Taraxacum	Taraxacum sinicum	Kitag.	*
Angiospermae	Asteraceae	Taraxacum	Taraxacum ussuriense	Kom.
Angiospermae	Asteraceae	Ixeris	Ixeris chinensis	(Thunb. ex Thunb.) Nakai
Angiospermae	Asteraceae	Crepidiastrum	Crepidiastrum denticulatum	(Houtt.) Pak & Kawano
Angiospermae	Asteraceae	Crepidiastrum	Crepidiastrum sonchifolium	(Maxim.) Pak & Kawano
Angiospermae	Asteraceae	Crepidifolium	Crepidifolium tenuifolium	(Willd.) Sennikov
Angiospermae	Asteraceae	Crepis	Crepis coreana	(Nakai) H.S.Pak
Angiospermae	Asteraceae	Crepis	Crepis tectorum	L.
Angiospermae	Asteraceae	Petasites	Petasites tatewakianus	Kitam.
Angiospermae	Asteraceae	Parasenecio	Parasenecio auriculatus	(DC.) J.R.Grant
Angiospermae	Asteraceae	Parasenecio	Parasenecio firmus	(Kom.) Y.L.Chen	*
Angiospermae	Asteraceae	Parasenecio	Parasenecio hastatus	(L.) H.Koyama
Angiospermae	Asteraceae	Parasenecio	Parasenecio hastatus var. glaber	(Ledeb.) Y.L.Chen	*
Angiospermae	Asteraceae	Parasenecio	Parasenecio komarovianus	(Pojark.) Y.L.Chen
Angiospermae	Asteraceae	Parasenecio	Parasenecio praetermissus	(Pojark.) Y.L.Chen
Angiospermae	Asteraceae	Syneilesis	Syneilesis aconitifolia	(Bunge) Maxim.
Angiospermae	Asteraceae	Ligularia	Ligularia mongolica	(Turcz.) DC.
Angiospermae	Asteraceae	Ligularia	Ligularia sachalinensis	Nakai	*
Angiospermae	Asteraceae	Ligularia	Ligularia sibirica	(L.) Cass.
Angiospermae	Asteraceae	Ligularia	Ligularia fischeri	(Ledeb.) Turcz.
Angiospermae	Asteraceae	Tephroseris	Tephroseris flammea	(Turcz. ex DC.) Holub
Angiospermae	Asteraceae	Tephroseris	Tephroseris integrifolia	(L.) Holub
Angiospermae	Asteraceae	Tephroseris	Tephroseris kirilowii	(Turcz. ex DC.) Holub	*
Angiospermae	Asteraceae	Tephroseris	Tephroseris palustris	(L.) Rchb.	*
Angiospermae	Asteraceae	Tephroseris	Tephroseris phaeantha	(Nakai) C.Jeffrey & Y.L.Chen	*
Angiospermae	Asteraceae	Tephroseris	Tephroseris subdentata	(Bunge) Holub
Angiospermae	Asteraceae	Senecio	Senecio ambraceus	Turcz. ex DC.	*
Angiospermae	Asteraceae	Senecio	Senecio cannabifolius var. integrifolius	(Koidz.) Kitam.	*
Angiospermae	Asteraceae	Senecio	Senecio nemorensis	L.
Angiospermae	Asteraceae	Jacobaea	Jacobaea argunensis	(Turcz.) B.Nord.	*
Angiospermae	Asteraceae	Jacobaea	Jacobaea cannabifolia	(Less.) E.Wiebe
Angiospermae	Asteraceae	Gnaphalium	Gnaphalium mandshuricum	Kirp. & Kuprian. ex Kirp.
Angiospermae	Asteraceae	Gnaphalium	Gnaphalium tranzschelii	Kirp.
Angiospermae	Asteraceae	Antennaria	Antennaria rosea subsp. confinis	(Greene) R.J.Bayer(Greene) R.J.Bayer
Angiospermae	Asteraceae	Tripolium	Tripolium pannonicum	(Jacq.) Dobrocz.
Angiospermae	Asteraceae	Galatella	Galatella dahurica	DC.
Angiospermae	Asteraceae	Aster	Aster ageratoides	Turcz.
Angiospermae	Asteraceae	Aster	Aster alpinus	L.	*
Angiospermae	Asteraceae	Aster	Aster hispidus	Thunb.	*
Angiospermae	Asteraceae	Aster	Aster maackii	Regel
Angiospermae	Asteraceae	Turczaninowia	Turczaninowia fastigiata	(Fisch.) DC.
Angiospermae	Asteraceae	Kalimeris	Kalimeris altaicus var. millefolius	(Vant.) Wang	*
Angiospermae	Asteraceae	Kalimeris	Kalimeris hispida	(Thunb.) Nees
Angiospermae	Asteraceae	Kalimeris	Kalimeris incisa	(Fisch.) DC.
Angiospermae	Asteraceae	Kalimeris	Kalimeris integrifolia	Turcz. ex DC.
Angiospermae	Asteraceae	Kalimeris	Kalimeris lautureana	(Debx.) Kitam.
Angiospermae	Asteraceae	Kalimeris	Kalimeris mongolica	(Franch.) Kitam.
Angiospermae	Asteraceae	Doellingeria	Doellingeria scabra	(Thunb.) Nees
Angiospermae	Asteraceae	Erigeron	Erigeron acer	L.
Angiospermae	Asteraceae	Erigeron	Erigeron acer subsp. manshuricus	(Kom.) Vorosch.
Angiospermae	Asteraceae	Erigeron	Erigeron acris subsp. politus	(Fr.) H.Lindb.
Angiospermae	Asteraceae	Erigeron	Erigeron annuus	(L.) Pers.	*
Angiospermae	Asteraceae	Erigeron	Erigeron canadensis	L.	*
Angiospermae	Asteraceae	Erigeron	Erigeron thunbergii	A.Gray	*
Angiospermae	Asteraceae	Conyza	Conyza japonica	(Thunb.) Less. ex Less.	*new gene
Angiospermae	Asteraceae	Solidago	Solidago decurrens	Lour.	*
Angiospermae	Asteraceae	Solidago	Solidago virgaurea subsp. dahurica	(Kitag.) Kitag.
Angiospermae	Asteraceae	Filifolium	Filifolium sibiricum	(L.) Kitam.
Angiospermae	Asteraceae	Ajania	Ajania pallasiana	(Fisch. ex Besser) Poljakov
Angiospermae	Asteraceae	Chrysanthemum	Chrysanthemum indicum	L.	*
Angiospermae	Asteraceae	Chrysanthemum	Chrysanthemum morifolium	Ramat.	*
Angiospermae	Asteraceae	Chrysanthemum	Chrysanthemum zawadskii	Herbich	*
Angiospermae	Asteraceae	Dendranthema	Dendranthema chanetii	(H.Lév.) C.Shih
Angiospermae	Asteraceae	Dendranthema	Dendranthema lavandulifolium var. seticuspe	(Maxim.) C.Shih	*
Angiospermae	Asteraceae	Dendranthema	Dendranthema naktongense	(Nakai) Tzvelev
Angiospermae	Asteraceae	Artemisia	Artemisia angustissima	Nakai
Angiospermae	Asteraceae	Artemisia	Artemisia annua	L.
Angiospermae	Asteraceae	Artemisia	Artemisia argyi	H.Lév. & Vaniot
Angiospermae	Asteraceae	Artemisia	Artemisia aurata	Kom.	*
Angiospermae	Asteraceae	Artemisia	Artemisia brachyloba	Franch.	*
Angiospermae	Asteraceae	Artemisia	Artemisia brachyphylla	Kitam.	*
Angiospermae	Asteraceae	Artemisia	Artemisia commutata	Besser
Angiospermae	Asteraceae	Artemisia	Artemisia desertorum	Spreng.
Angiospermae	Asteraceae	Artemisia	Artemisia gmelinii	Weber ex Stechm.
Angiospermae	Asteraceae	Artemisia	Artemisia igniaria	Maxim.
Angiospermae	Asteraceae	Artemisia	Artemisia integrifolia	Richards.
Angiospermae	Asteraceae	Artemisia	Artemisia japonica	Thunb.
Angiospermae	Asteraceae	Artemisia	Artemisia kawakamii	Hayata	*
Angiospermae	Asteraceae	Artemisia	Artemisia keiskeana	Miq.
Angiospermae	Asteraceae	Artemisia	Artemisia laciniata	Willd.	*
Angiospermae	Asteraceae	Artemisia	Artemisia lagocephala	(Fisch. ex Besser) DC.
Angiospermae	Asteraceae	Artemisia	Artemisia lancea	Vaniot	*
Angiospermae	Asteraceae	Artemisia	Artemisia latifolia	Ledeb.
Angiospermae	Asteraceae	Artemisia	Artemisia manshurica	(Komar.) Komar.
Angiospermae	Asteraceae	Artemisia	Artemisia oxycephala	Kitag.	*
Angiospermae	Asteraceae	Artemisia	Artemisia phaeolepis	Krasch.
Angiospermae	Asteraceae	Artemisia	Artemisia pubescens	Ledeb.
Angiospermae	Asteraceae	Artemisia	Artemisia rubripes	Nakai
Angiospermae	Asteraceae	Artemisia	Artemisia scoparia	Waldst. & Kitam.
Angiospermae	Asteraceae	Artemisia	Artemisia sieversiana	Ehrh.
Angiospermae	Asteraceae	Artemisia	Artemisia stolonifera	(Maxim.) Kom.
Angiospermae	Asteraceae	Artemisia	Artemisia subulata	Nakai
Angiospermae	Asteraceae	Artemisia	Artemisia sylvatica	Maxim.	*
Angiospermae	Asteraceae	Artemisia	Artemisia tanacetifolia	L.
Angiospermae	Asteraceae	Artemisia	Artemisia umbrosa	(Besser) Turcz.
Angiospermae	Asteraceae	Artemisia	Artemisia vestita	Wall. ex Besser	*
Angiospermae	Asteraceae	Artemisia	Artemisia vulgaris	L.
Angiospermae	Asteraceae	Artemisia	Artemisia zhongdianensis	Y.R.Ling	*
Angiospermae	Asteraceae	Matricaria	Matricaria chamomilla	L.	*new gene
Angiospermae	Asteraceae	Achillea	Achillea acuminata	(Ledeb.) Sch.Bip.
Angiospermae	Asteraceae	Achillea	Achillea alpina	L.
Angiospermae	Asteraceae	Achillea	Achillea asiatica	Serg.
Angiospermae	Asteraceae	Achillea	Achillea millefolium		*
Angiospermae	Asteraceae	Achillea	Achillea ptarmicoides	Maxim.
Angiospermae	Asteraceae	Tripleurospermum	Tripleurospermum limosum	(Maxim.) Pobed.	*
Angiospermae	Asteraceae	Tripleurospermum	Tripleurospermum tetragonospermum	(F.Schmidt) Pobed.
Angiospermae	Asteraceae	Inula	Inula britanica	L.
Angiospermae	Asteraceae	Inula	Inula britanica var. sublanata	Komar.	*
Angiospermae	Asteraceae	Inula	Inula chinensis	(Kom.) Kom.	*
Angiospermae	Asteraceae	Inula	Inula japonica	Thunb.
Angiospermae	Asteraceae	Inula	Inula linariifolia	Turcz.
Angiospermae	Asteraceae	Inula	Inula salicina	L.	*
Angiospermae	Asteraceae	Carpesium	Carpesium macrocephalum	Franch. & Sav.	*
Angiospermae	Asteraceae	Carpesium	Carpesium triste	Maxim.
Angiospermae	Asteraceae	Bidens	Bidens cernua	L.	*
Angiospermae	Asteraceae	Bidens	Bidens maximowicziana	Oett.
Angiospermae	Asteraceae	Bidens	Bidens parviflora	Willd.	*
Angiospermae	Asteraceae	Bidens	Bidens radiata	Thuill.
Angiospermae	Asteraceae	Bidens	Bidens tripartita	L.	*
Angiospermae	Asteraceae	Xanthium	Xanthium strumarium subsp. sibiricum	(Patrin ex Widder) Greuter
Angiospermae	Asteraceae	Eupatorium	Eupatorium lindleyanum	DC.	*
Angiospermae	Asteraceae	Eupatorium	Eupatorium lindleyanum	DC.
Angiospermae	Adoxaceae	Viburnum	Viburnum burejaeticum	Regel & Herd.
Angiospermae	Adoxaceae	Viburnum	Viburnum mongolicum	(Pall.) Rehder	*
Angiospermae	Adoxaceae	Viburnum	Viburnum opulus subsp. calvescens	(Rehder) Sugim.
Angiospermae	Adoxaceae	Viburnum	Viburnum sargentii	Koehne
Angiospermae	Adoxaceae	Sambucus	Sambucus latipinna	Nakai	*
Angiospermae	Adoxaceae	Sambucus	Sambucus sibirica	Nakai	*
Angiospermae	Adoxaceae	Sambucus	Sambucus williamsii	Hance
Angiospermae	Adoxaceae	Adoxa	Adoxa moschatellina	L.
Angiospermae	Caprifoliaceae	Lonicera	Lonicera caerulea	L.	*
Angiospermae	Caprifoliaceae	Lonicera	Lonicera chrysantha	Turcz. ex Ledeb.
Angiospermae	Caprifoliaceae	Lonicera	Lonicera ferdinandii	Franch.	*
Angiospermae	Caprifoliaceae	Lonicera	Lonicera japonica	Thunb.	*
Angiospermae	Caprifoliaceae	Lonicera	Lonicera maackii	(Rupr.) Maxim.
Angiospermae	Caprifoliaceae	Lonicera	Lonicera maximowiczii	(Rupr.) Regel
Angiospermae	Caprifoliaceae	Lonicera	Lonicera nigra	L.	*
Angiospermae	Caprifoliaceae	Lonicera	Lonicera praeflorens	Batalin
Angiospermae	Caprifoliaceae	Lonicera	Lonicera ruprechtiana	Regel
Angiospermae	Caprifoliaceae	Lonicera	Lonicera subhispida	Nakai	*
Angiospermae	Caprifoliaceae	Lonicera	Lonicera venulosa subsp. edulis	(Turcz. ex Freyn) Vorosch.
Angiospermae	Caprifoliaceae	Linnaea	Linnaea borealis	L.
Angiospermae	Caprifoliaceae	Patrinia	Patrinia rupestris	(Pall.) Dufr.
Angiospermae	Caprifoliaceae	Patrinia	Patrinia scabiosifolia	Link
Angiospermae	Caprifoliaceae	Patrinia	Patrinia scabra	Bunge	*
Angiospermae	Caprifoliaceae	Patrinia	Patrinia scabiosifolia	Link	*
Angiospermae	Caprifoliaceae	Valeriana	Valeriana amurensis	P. Smirn. ex Kom.
Angiospermae	Caprifoliaceae	Valeriana	Valeriana fauriei	Briq.
Angiospermae	Caprifoliaceae	Valeriana	Valeriana officinalis	L.
Angiospermae	Caprifoliaceae	Scabiosa	Scabiosa comosa	Fisch. ex Roem. & Schult.
Angiospermae	Caprifoliaceae	Scabiosa	Scabiosa tschiliensis	Grüning
Angiospermae	Araliaceae	Panax	Panax ginseng	C.A.Mey.
Angiospermae	Araliaceae	Panax	Panax pseudoginseng	Wall.	*
Angiospermae	Araliaceae	Panax	Panax quinquefolius	L.	*
Angiospermae	Araliaceae	Aralia	Aralia continentalis	Kitag.	*
Angiospermae	Araliaceae	Aralia	Aralia elata	(Miq.) Seem.
Angiospermae	Araliaceae	Eleutherococcus	Eleutherococcus senticosus	(Rupr. & Maxim.) Maxim.
Angiospermae	Araliaceae	Eleutherococcus	Eleutherococcus sessiliflorus	(Rupr. & Maxim.) S.Y.Hu
Angiospermae	Apiaceae	Sanicula	Sanicula chinensis	Bunge
Angiospermae	Apiaceae	Sanicula	Sanicula rubriflora	F. Schmidt ex Maxim.
Angiospermae	Apiaceae	Sanicula	Sanicula tuberculata	Maxim.	*
Angiospermae	Apiaceae	Bupleurum	Bupleurum angustissimum	(Franch.) Kitag.	*
Angiospermae	Apiaceae	Bupleurum	Bupleurum bicaule	Helm	*
Angiospermae	Apiaceae	Bupleurum	Bupleurum chinense	DC.
Angiospermae	Apiaceae	Bupleurum	Bupleurum komarovianum	Lincz.
Angiospermae	Apiaceae	Bupleurum	Bupleurum longiradiatum	Turcz.
Angiospermae	Apiaceae	Bupleurum	Bupleurum scorzonerifolium	Willd.
Angiospermae	Apiaceae	Bupleurum	Bupleurum sibiricum	Vest ex Spreng.
Angiospermae	Apiaceae	Pleurospermum	Pleurospermum uralense	Hoffm.	*new gene
Angiospermae	Apiaceae	Cicuta	Cicuta virosa	L.
Angiospermae	Apiaceae	Oenanthe	Oenanthe javanica	(Blume) DC.
Angiospermae	Apiaceae	Oenanthe	Oenanthe javanica subsp. rosthornii	(Diels) F.T. Pu	*
Angiospermae	Apiaceae	Sium	Sium suave	Walter
Angiospermae	Apiaceae	Anthriscus	Anthriscus sylvestris	(L.) Hoffm.	*
Angiospermae	Apiaceae	Osmorhiza	Osmorhiza aristata	Makino & Jabe	*new gene
Angiospermae	Apiaceae	Anethum	Anethum graveolens	L.	*new gene
Angiospermae	Apiaceae	Eriocycla	Eriocycla albescens var. latifolia	Shan et Yuan	*new gene
Angiospermae	Apiaceae	Aegopodium	Aegopodium alpestre	Ledeb.
Angiospermae	Apiaceae	Pimpinella	Pimpinella cnidioides	H. Pearson ex H. Wolff
Angiospermae	Apiaceae	Pimpinella	Pimpinella thellungiana	H. Wolff
Angiospermae	Apiaceae	Angelica	Angelica amurensis	Schischk.	*
Angiospermae	Apiaceae	Angelica	Angelica anomala	Avé-Lall.
Angiospermae	Apiaceae	Angelica	Angelica cartilaginomarginata	(Makino ex Y.Yabe) Nakai	*
Angiospermae	Apiaceae	Angelica	Angelica cincta	H.Boissieu
Angiospermae	Apiaceae	Angelica	Angelica czernaevia	(Fisch. & C.A.Mey.) Kitag.
Angiospermae	Apiaceae	Angelica	Angelica dahurica	(Hoffm.) Benth. & Hook.f. ex Franch. & Sav.
Angiospermae	Apiaceae	Angelica	Angelica decursiva	(Miq.) Franch. & Sav.	*
Angiospermae	Apiaceae	Angelica	Angelica gigas	Nakai	*
Angiospermae	Apiaceae	Angelica	Angelica maximowiczii	(F.Schmidt) Benth. ex Maxim.
Angiospermae	Apiaceae	Angelica	Angelica maximowiczii var. australis	(Kom.) Gorovoj
Angiospermae	Apiaceae	Angelica	Angelica nakaiana	(Kitag.) Pimenov	*
Angiospermae	Apiaceae	Angelica	Angelica polymorpha	Maxim.	*
Angiospermae	Apiaceae	Ostericum	Ostericum sieboldii var. praeteritum	(Kitag.) Y. Huei Huang	*new gene
Angiospermae	Apiaceae	Carlesia	Carlesia sinensis	Dunn	*
Angiospermae	Apiaceae	Cnidium	Cnidium dauricum	(Jacq.) Fisch. & C.A.Mey.	*new gene
Angiospermae	Apiaceae	Libanotis	Libanotis seseloides	(Fisch. & C.A. Mey. ex Turcz.) Turcz.
Angiospermae	Apiaceae	Peucedanum	Peucedanum elegans	Kom.
Angiospermae	Apiaceae	Peucedanum	Peucedanum terebinthaceum	(Fisch. ex Trevir.) Ledeb.
Angiospermae	Apiaceae	Peucedanum	Peucedanum terebinthaceum var. deltoideum	(Makino ex K. Yabe) Makino	*
Angiospermae	Apiaceae	Saposhnikovia	Saposhnikovia divaricata	(Turcz.) Schischk.
Angiospermae	Apiaceae	Heracleum	Heracleum hemsleyanum	Diels	*
Angiospermae	Apiaceae	Heracleum	Heracleum lanatum	Michx.	*
Angiospermae	Apiaceae	Heracleum	Heracleum moellendorffii	Hance
Angiospermae	Apiaceae	Heracleum	Heracleum sphondylium subsp. montanum	(Schleich. ex Gaudin) Briq.
